1 Title: Enhanced metabolic detoxification is associated with fluroxypyr resistance in *Bassia*  
2 *scoparia*

3 Olivia E. Todd<sup>1,2</sup>, Eric L. Patterson<sup>3</sup>, Eric P. Westra<sup>2,4</sup>, Scott J. Nissen<sup>2</sup>, André Lucas Simões  
4 Araujo<sup>2</sup>, William B. Kramer<sup>2</sup>, Franck E. Dayan<sup>2</sup>, Todd A. Gaines<sup>2\*</sup>

5  
6 <sup>1</sup>United States Department of Agriculture – Agriculture Research Service, Fort Collins, CO  
7 80525, USA

8 <sup>2</sup>Department of Agricultural Biology, Colorado State University, Fort Collins, CO 80523, USA

9 <sup>3</sup>Department of Plant, Soil, and Microbial Sciences, Michigan State University, East Lansing, MI  
10 48824, USA.

11 <sup>4</sup>Department of Plants, Soils & Climate, Utah State University, Logan, UT 84322, USA

12 \*Author for correspondence: Todd Gaines, Department of Agricultural Biology, Colorado State  
13 University, Fort Collins, USA, 970-491-6824, [Todd.Gaines@colostate.edu](mailto:Todd.Gaines@colostate.edu)

14  
15 ORCID IDs:

16  
17 Olivia Todd: (ORCID 0000-0002-5727-1886)

18 Eric Patterson: (ORCID 0000-0001-7111-6287)

19 Eric Westra: (ORCID 0000-0003-3231-6985)

20 André Araujo: (ORCID 0000-0001-5331-0924)

21 William Kramer: (ORCID 0009-0009-0614-1457)

22 Franck Dayan: (ORCID 0000-0001-6964-2499)

23 Todd Gaines: (ORCID 0000-0003-1485-7665)

24

25

26 Abstract:

27 Auxin-mimic herbicides chemically mimic the phytohormone indole-3-acetic-acid (IAA).  
28 Within the auxin-mimic herbicide class, the herbicide fluroxypyr has been extensively used to  
29 control an agronomically problematic Great Plains tumbleweed, kochia (*Bassia scoparia*). A  
30 2014 field survey for herbicide resistance in kochia populations across Colorado identified a  
31 putative fluroxypyr resistant population that was assessed for response to five different  
32 herbicides representing four different herbicide modes of action. These included fluroxypyr and  
33 dicamba (auxin-mimics), atrazine (photosystem II inhibitor), glyphosate (EPSPS inhibitor), and  
34 chlorsulfuron (acetolactate synthase inhibitor). The greenhouse screen identified that this kochia  
35 population was resistant to fluroxypyr and chlorsulfuron, but sensitive to glyphosate, atrazine,  
36 and dicamba. This population was designated Flur-R. Subsequent dose response studies  
37 determined that 75% of the Flur-R population survived 628 g ae ha<sup>-1</sup> of fluroxypyr (4× the label  
38 application rate in wheat fallow, which is 157 g ae ha<sup>-1</sup> at 1×). Flur-R was 40 times more  
39 resistant to fluroxypyr than a susceptible population (J01-S) collected from the same field survey  
40 (LD<sub>50</sub> 720 and 20 g ae ha<sup>-1</sup>, respectively). Auxin-responsive gene expression increased following  
41 fluroxypyr treatment in Flur-R, J01-S, and in a dicamba-resistant, fluroxypyr-susceptible line  
42 9425 in an RNA-sequencing experiment. In Flur-R, several transcripts with molecular functions  
43 for conjugation and transport were constitutively higher expressed, such as glutathione S-  
44 transferases (GSTs), UDP-glucosyl transferase (GT), and ATP binding cassette transporters  
45 (ABC transporters). After analyzing metabolic profiles over time, both Flur-R and J01-S rapidly  
46 converted [<sup>14</sup>C]-fluroxypyr ester, the herbicide formulation applied to plants, to [<sup>14</sup>C]-fluroxypyr  
47 acid, the biologically active form of the herbicide, and three unknown metabolites. Formation  
48 and flux of these metabolites was faster in Flur-R than J01-S, reducing the concentration of  
49 phytotoxic fluroxypyr acid. One unique metabolite was present in Flur-R that was not present in  
50 the J01-S metabolic profile. Gene sequence variant analysis specifically for auxin receptor and  
51 signaling proteins revealed the absence of non-synonymous mutations affecting auxin signaling  
52 and binding in candidate auxin target site genes, further supporting our hypothesis that non-target  
53 site metabolic degradation is contributing to fluroxypyr resistance in Flur-R.

54

55 Key Words: Herbicide Resistance, NTSR, Synthetic Auxin

56 Significance Statement:

57 Herbicide resistance is an ever-present issue in weeds of cropping and rangeland systems.  
58 By understanding genetic mechanisms of resistance in individual cases of herbicide resistance,  
59 we can extrapolate important information such as how quickly resistance to a specific herbicide  
60 can spread. Every characterized herbicide resistance mechanism contributes to a working  
61 database used to address herbicide resistance in an agricultural or open-space setting. Knowing  
62 the exact mechanism of resistance helps researchers and industry members understand why  
63 herbicide applications are failing, and if resistant plants can still be controlled with other  
64 herbicide modes of action. In kochia line Flur-R, there is strong evidence to support a non-target  
65 site resistance mechanism, specifically herbicide degradation via increased enzymatic activity.  
66 Increased fluroxypyr degradation represents a novel resistance mechanism to fluroxypyr in the  
67 weed *Bassia scoparia*.

68

69 **1. Introduction:**

70 Kochia (*Bassia scoparia*) is an invasive, annual, broadleaf tumbleweed that is  
71 problematic in agronomic settings, open spaces, and rangeland in the U.S., specifically across the  
72 Great Plains. Herbicides, chemicals used to control unwanted plants, are the most prescribed  
73 method for kochia control in the U.S. Herbicide resistance in kochia is widespread, with  
74 resistance reported to multiple modes of action including ALS inhibitors (Group 2), glyphosate  
75 (Group 9), auxin-mimics (Group 4), and atrazine (Group 5), as well as cross-resistance to more  
76 than one Group 4 auxin-mimic herbicide (Geddes et al. 2021a; Kumar et al. 2019a; Kumar et al.  
77 2019b). Furthermore, multiple resistance is increasingly common, where one population that is  
78 simultaneously resistant to more than one mode of action (Varanasi et al. 2015). The prevalence  
79 of glyphosate, atrazine, and ALS inhibitor resistant kochia has resulted in increased use of auxin-  
80 mimic herbicides for kochia management, mainly dicamba and fluroxypyr, in no-till fallow,  
81 wheat, and corn in the Great Plains region (Kumar et al. 2019b). While auxin-mimics have been  
82 used for more than 70 years, the evolution of resistance to this mode of action has lagged behind  
83 other herbicide modes of action (Busi et al. 2018). Despite this lag, recent evidence suggests that  
84 auxin-mimic resistance and multiple resistance in kochia is increasing (Geddes et al. 2022). Nine  
85 reports of auxin-mimic resistance across six U.S. states and two Canadian provinces have

86 described resistance in kochia populations as either resistant to dicamba alone, or resistant to  
87 both dicamba and fluroxypyr (Geddes et al. 2021b; Heap 2021; Jha et al. 2015; Kumar et al.  
88 2019a). These herbicides mimic the phytohormone indole-3-acetic-acid (IAA) because they are  
89 chemically similar and induce auxin response gene transcription following application in weeds  
90 (Grossmann 2010; McCauley et al. 2020; Pettinga et al. 2018; Xu et al. 2022) (Figure 1).

91 IAA is an auxin plant growth hormone that is responsible for gravitropism and response  
92 to light stimuli; however, it impacts several other growth phenotypes as well (Zhao 2010). While  
93 auxins are involved in many cellular processes and signaling with other phytohormones, their  
94 function can be understood at the cellular level to primarily coordinate cell elongation (Perrot-  
95 Rechenmann 2010). In plants, auxin homeostasis is tightly regulated through a suite of  
96 biosynthesis pathways, cellular transport, feedback inhibition, oxidation and conjugation  
97 (Rosquete et al. 2012). When IAA reaches high levels in the plant, polar auxin carriers such as  
98 Pin-formed (PIN) efflux transporters, ATP binding cassettes (ABC class B) and Auxin resistant-  
99 1/like AUX1s influx carriers (AUX/LAX) help maintain IAA homeostasis and gradients (Cho  
100 and Cho 2013). Because the auxin-mimic herbicide fluroxypyr is chemically similar to and  
101 behaves like IAA, it is hypothesized that PIN, ABCs and AUX/LAX are able to direct the flow  
102 of fluroxypyr throughout the plant. In addition, fluroxypyr is a weak acid that can translocate in  
103 the plant based on its pKa and log Kow. Fluroxypyr also binds to Auxin signaling F-box 5, a  
104 member of the Transport inhibitor response1/Auxin signaling F-box (TIR1/AFB) receptor family  
105 (Lee et al. 2014). When applied, fluroxypyr and IAA act to stabilize the complex formed  
106 between AFB5 and the auxin dependent transcriptional regulator Indole-3-acetic acid inducible  
107 (Aux/IAA) proteins. Upon creation of this coreceptor-ligand complex, Aux/IAA proteins are  
108 ubiquitinated, degraded, and no longer negatively regulate Auxin Response Factors (ARF).  
109 These ARF proteins are seated on the Auxin Response Element (AuxRE) in auxin mediated gene  
110 promoters (Teale et al. 2006).

111 In Arabidopsis, plants treated with IAA or auxin-mimic herbicide (2,4-D) showed  
112 expression of early response genes such as Aux/IAAs and small auxin-up RNAs (SAURs). Other  
113 auxin induced genes included 1-aminocyclopropane-1 synthase (ACS), the first committed step  
114 in ethylene production and GH3, an auxin homeostasis gene. These genes were transcribed  
115 within minutes of high auxin perception (Guilfoyle 1999; Paponov et al. 2008; Raghavan et al.  
116 2005). Many other phytohormone responses are also regulated by auxin perception, such as

117 Cytokinin oxidase (CXX6), brassinosteroid biosynthesis gene BAS1, and several gibberellin  
118 related genes. Regulation of multiple hormone related genes suggests that the relationship  
119 between phytohormones and auxin response is complex (Paponov et al. 2008). When the auxin-  
120 mimic herbicide fluroxypyr is applied to a plant, the resulting phenotypic response is stem-  
121 twisting, thickening, and lack of new growth at the meristem.

122 Herbicide resistance is categorized as either target site or non-target site (Gaines et al.  
123 2020). Target site resistance is defined as a change (either in conformation or in expression) in a  
124 herbicide target protein. These changes often decrease herbicide binding affinity or in the case of  
125 overexpression, make it so the entire target protein pool is unable to be entirely inhibited  
126 (Murphy and Tranel 2019). LeClere et al. (2018) reported resistance to the auxin-mimic  
127 herbicide dicamba in kochia was due to the target-site mutation Gly127Asn in *IAA16*, which  
128 affects the formation of the coreceptor-ligand complex. More recently, Figueiredo et al. (2022b)  
129 characterized a 27-nucleotide deletion in the degron tail region of the gene encoding Aux/IAA2  
130 that confers 2,4-D and dicamba resistance in Indian hedge mustard (*Sisymbrium orientale*). This  
131 deletion also affects formation and stability of the co-receptor-ligand complex. Non-target site  
132 resistance is broadly recognized as all other methods unrelated to target site resistance and is  
133 often exemplified by metabolic detoxification of an herbicide, herbicide sequestration, or a  
134 variant in a metabolism catalyzing enzyme which may have a downstream effect by reducing the  
135 efficacy of the herbicide (Delye 2013). Reduced translocation of 2,4-D via auxin transport  
136 proteins was reported by Goggin et al. (2019) in wild radish (*Raphanus raphanistrum*). A 2,4-D  
137 resistant population of waterhemp (*Amaranthus tuberculatus*) rapidly metabolized 2,4-D via  
138 CYP450 5-OH hydroxylation and subsequent amino acid and sugar conjugation reactions, which  
139 produced less phytotoxic metabolites that lost auxin signaling activity (Figueiredo et al. 2022a;  
140 Figueiredo et al. 2018). With both target site and non-target site resistance mechanisms described  
141 for auxin-mimic resistance (Todd et al. 2020), both possibilities are investigated in this study.

142 Our research objectives were to (1) **distinguish the application rate at which the**  
143 **fluroxypyr resistant kochia line (Flur-R) is resistant using a herbicide dose response,** (2)  
144 **determine whether fluroxypyr resistant kochia has any differences in absorption,**  
145 **translocation, or metabolism of fluroxypyr,** and (3) **identify potential candidate genes that**  
146 **may contribute to fluroxypyr resistance in Flur-R using RNA sequencing and alignment to**  
147 **the kochia genome assembly** (Hall et al. 2023).

148 In our work, a kochia population that was resistant to fluroxypyr converted fluroxypyr-  
149 ester into fluroxypyr-acid and subsequent metabolites at a faster rate than a susceptible line.  
150 Furthermore, the resistant line produced a metabolite that was not detected in the susceptible  
151 line. The results from an RNA-seq fluroxypyr-induced differential expression analysis show  
152 increased transcript expression of cellular transporters, cytochrome P450 monooxygenases  
153 (CYP450), glutathione s-transferases (GSTs) and UDP-glucosyl transferase (GTs) in the resistant  
154 plants. Taken together, these data suggest that metabolic detoxification of fluroxypyr may be the  
155 mechanism of fluroxypyr resistance in Flur-R.

156

## 157 **2. Materials and Methods**

### 158 *2.1 Plant Materials*

159 In 2014, 171 kochia (*Bassia scoparia*) populations were collected from a field survey  
160 conducted in eastern Colorado (Westra et al. 2019). These populations were screened at a single  
161 doses of dicamba, fluroxypyr, and glyphosate to test for resistance. One population, Flur-R, was  
162 found to have a few individuals (<2%) surviving a single fluroxypyr dose of 157 g ae ha<sup>-1</sup> (label  
163 rate for use in wheat) (Starane Ultra, Dow Agrosiences, Indianapolis, IN). Survivors at 157g ae  
164 ha<sup>-1</sup> were selected and allowed to bulk pollinate. After two more generations of selection at both  
165 157g ae ha<sup>-1</sup> and 314 g ae ha<sup>-1</sup>, the surviving individuals were cross-pollinated. The progeny of  
166 these plants were found to be uniformly resistant to 314g ae ha<sup>-1</sup> fluroxypyr. During the bulking  
167 stages, groups of three to four plants were planted in one gallon pots and covered with a  
168 pollination bags to allow for cross-pollination. Seed was harvested per pot, hand threshed and  
169 cleaned using an air-column blower. Seeds were stored at 4 C and planted in the spring in a  
170 greenhouse maintained at 25 C with a 16 h photoperiod. An inbred dicamba resistant/fluroxypyr  
171 susceptible population (9425) homozygous for a G127N mutation in the *IAA16* gene (LeClere et  
172 al. 2018; Preston et al. 2009) and a fluroxypyr susceptible field population from the 2014 eastern  
173 Colorado field study (J01-S) (Westra et al. 2019) were included in the dose response and single  
174 dose screening as susceptible controls.

175

### 176 *2.2 Fluroxypyr and Dicamba Dose Response*

177 Seeds of Flur-R, J01-S, and 9425 were planted in 1.5 cm<sup>2</sup> 280-count plug flats. Plants  
178 were sub-irrigated and thinned down to one plant per cell. When plants were approximately 4-5

179 cm tall, uniform seedlings were transplanted to 4 cm<sup>2</sup> plastic pots containing SunGro potting mix  
180 (American Clay Works Supply, Denver, CO). Plants kept in the greenhouse under conditions  
181 previously described. They were sub-irrigated once a week for three weeks until the plants  
182 reached 10 cm height. A randomized complete block design was used for each dose, with one  
183 plant per pot, four plants per dose and three replications for a total of 12 treated plants. The dose  
184 response for fluroxypyr included the following eight rates: 0, 20, 40, 80, 157, 314, 628, and  
185 1,256 g ae ha<sup>-1</sup> fluroxypyr (Starane Ultra, Corteva Agrisciences, Indianapolis, IN). The dicamba  
186 doses included 0, 35, 70, 140, 280 (1x), 560, 1120, and 2240 g ae ha<sup>-1</sup> (Engenia, BASF, Research  
187 Triangle Park, NC) mixed with Induce (NIS, 0.25% v/v, Helena Agri-Enterprises, LLC, 24330  
188 US-34 Greely, CO 80631). Applications were made with a DeVries Generation 4 Research  
189 Track Sprayer (DeVries Manufacturing, Hollandale, MN, 86956) equipped with a TeeJet (TeeJet  
190 Technologies, 1801 Business Park drive, Springfield, IL) 8002EVS nozzle calibrated to deliver  
191 187 L ha<sup>-1</sup>. Plant height was measured by recording the distance in centimeters from the soil  
192 surface to the newest leaf in the apical meristem before treating and was measured again 30 days  
193 after treatment. Survival (dead or alive) was also recorded 30 days after treatment. An individual  
194 was considered “dead” if it displayed severe epinasty, stem thickening, yellowing, and had no  
195 new growth at the axillary or primary meristems after 30 days. An individual was considered  
196 “alive” if it displayed minimal to no epinasty or stem thickening, had no yellowing, and had new  
197 growth at the axillary or primary meristems after 30 days. Percent survival was chosen for  
198 fluroxypyr resistance assessment because while percent change in height can accurately  
199 differentiate between resistant and susceptible plants, for this population it did not accurately  
200 represent an actively growing plant in the individuals where axillary meristem growth was the  
201 primary source of regrowth.

202 For data analysis, the response variable “Percent Survival” was created by transforming  
203 binary data according to the equation:

$$204 \quad Y = \left( \frac{N_1}{N_{total}} \right) * 100 \quad [1]$$

205 Where  $Y$  is the percent survival at each calculated dose,  $N_1$  is the number of individuals marked  
206 as “alive” according to the parameters above.  $N_{total}$  is the number of individuals per rate.

207 The response variable “Percent Change in Height” over 30 days was normalized using the  
208 following equation:

$$209 \quad Y = (X_{\Delta Height} / A_{Avg}) * 100 \quad [2]$$



210 Where  $Y$  is the change in height as a percent of the 0 g ae ha<sup>-1</sup> rate for each population.  $X_{\Delta Height}$   
211 is the change in height in centimeters for an individual from day 0 to 30 days, and  $A_{Avg}$  is the  
212 average change in height for individuals at the 0 g ae ha<sup>-1</sup> rate for the population being measured.  
213 The model used by the *drm* package in R did not converge for the J01-S or 9425 lines using  
214 “Percent Change in Height (% control)” as a response variable due to the non-sigmoidal behavior  
215 of the curve, so “Percent Survival” data were analyzed using a three-parameter log-logistic  
216 model (Knezevic et al. 2007), which was the best model by a lack-of-fit test from the *drc*  
217 package in R (R Core Team 2020) with the equation:

$$218 \quad Y = \frac{d}{1 + \exp [b (\log [(x - \log) (e)])]} [3]$$

219 where  $Y$  is the percent survival 30 days after treatment,  $d$  is the upper limit parameter,  $b$  is the  
220 regression slope,  $x$  is the dose of either fluroxypyr or dicamba in g ae ha<sup>-1</sup> and  $e$  is the dose at  
221 which 50% mortality is achieved (Table 1). The data were averaged per treatment and the  
222 standard error of the mean is presented per dose. “Rate” and “Population” were used as predictor  
223 variables and the experiment was repeated.

224

### 225 *2.3 Glyphosate, Atrazine, and Chlorsulfuron Single Rate Screening*

226 Flur-R and J01-S seeds were planted in 4 cm<sup>2</sup> plastic pots containing SunGro potting  
227 mix. Plants were sub-irrigated and thinned down to one plant per cell and kept at greenhouse  
228 conditions previously described. When plants were approximately 7 cm in height, plants were  
229 treated with one of the following herbicides (n=72 plants per herbicide): atrazine (Aatrex 4L,  
230 Syngenta, Greensboro, NC, 2240 g ai ha<sup>-1</sup>, 1% crop oil concentrate), chlorsulfuron (Telar XP,  
231 Bayer CropScience, St. Louis, MO, 137 g ai ha<sup>-1</sup>), or glyphosate (RoundUp Powermax,  
232 Monsanto Company, St. Louis, MO, 870 g ae ha<sup>-1</sup>, 2% w/v ammonium sulfate). All treatments  
233 were applied with the same equipment and nozzle type described above. Survival (dead or alive)  
234 was assessed 30 days after treatment. In a *post hoc* analysis, a random number generator was  
235 used to assign each of the 72 individuals to one of three blocks with n=24 to serve as replicates.  
236 Standard error of the mean was calculated using the standard deviation from this analysis.

237

### 238 *2.4 Kompetitive allele specific PCR (KASP)*

239 Approximately 200 mg of meristem tissue was harvested from 20 individuals each of  
240 Flur-R and 5 individuals for the mutant and wild type checks. Flur-R individuals were verified as



241 resistant by spraying with 157 g ae ha<sup>-1</sup> fluroxypyr. Tissue was put into a 1.5 mL Eppendorf tube  
242 and flash frozen in liquid nitrogen. DNA extraction protocol was adapted from Aboul-Maaty and  
243 Oraby (2019) using the established CTAB method. DNA purification was checked using a  
244 NanoDrop2000 and diluted to 5 ng uL<sup>-1</sup>. The FAM fluorophore (in bold) was added to the  
245 forward primer specific to the G127N *IAA16* double mutation (allele specific sequence in italics)  
246 endowing a protein change from wildtype GWPPV to NWPPV in kochia described by LeClere et  
247 al. (2018) (5'**GAAGGTGACCAAGTTCATGCTTGTTCCTTCAGGACACAAGTTGTA**AA)  
248 and the HEX fluorophore (in bold) was added to the forward primer specific to the wild type  
249 sequence (in italics)  
250 (5'**GAAGGTCGGAGTCAACGGATTTGTTCTTCAGGACACAAGTTGTAGG**). One  
251 universal reverse primer (5' AGTTTGATCATCGGACGTCTTCTT) and the forward primers  
252 were designed with IDT PrimerQuest. The KASP protocol and specific mix ratios are published  
253 on protocols.io at [dx.doi.org/10.17504/protocols.io.dm6gpj9njgzp/v1](https://dx.doi.org/10.17504/protocols.io.dm6gpj9njgzp/v1). Fluorescence was  
254 recorded at the end of every cycle. Fluorescence at the 35<sup>th</sup> cycle was used for the allelic  
255 discrimination data. Data were plotted using GraphPad Prism version 8.4.2. Genotypes were  
256 assigned manually as homozygous wildtype, homozygous mutant, or heterozygous.

257

## 258 *2.5 Plant Material for Fluroxypyr Absorption, Translocation, and Metabolism*

259 Seeds from Flur-R and J01-S were sown into plug flats filled with SunGro potting mix  
260 and grown on a light shelf under 700 μmol m<sup>-2</sup> s<sup>-1</sup> of light at 25 C. When the plants reached 3-4  
261 cm tall, 50 seedlings from each line were washed of soil in the roots and transplanted into a 25  
262 mL Eppendorf tube filled with silica sand and fertilized with three granules of Osmocote.  
263 Uniform plants that were 4-5 cm tall and had recovered from transplanting were used in all  
264 subsequent absorption, translocation and metabolism experiments.

265

## 266 *2.6 Fluroxypyr Absorption and Translocation*

267 Flur-R (n=24) and J01-S (n=24) plants were sprayed with 157 g ae ha<sup>-1</sup> fluroxypyr using  
268 a track sprayer as described in section 2.2. The third and fourth youngest leaves were protected  
269 from the broadcast application using aluminum foil. Immediately after applying fluroxypyr, the  
270 covered leaves of were treated with five 1 μL drops of the spray solution spiked with 3.1 kBq  
271 [<sup>14</sup>C]-fluroxypyr. Absorption and translocation were monitored over a 196 h time course, with

272 time points at 6, 12, 24, 48, 96 and 192 hours after treatment (HAT). Four Flur-R and four J01-S  
273 were harvested at each timepoint. Treated leaves were removed and washed in 5 mL 90% water,  
274 10% methanol, and 0.5% non-ionic surfactant. The leaf wash was mixed with 10 mL scintillation  
275 cocktail (Ecoscint XR) and radioactivity was measured using a liquid scintillation counter (LSC)  
276 (TRI-CARB 2300TR, Packard Instruments Co., USA). Roots were washed with 5 mL water.  
277 Root wash and the silica sand rinse solution were vortexed for 3 seconds, and 1 mL of the root  
278 wash and sand rinse mixture was added to 10 mL scintillation cocktail to measure root  
279 exudation. Plants were sectioned and separated as follows: above treated leaves, treated leaves,  
280 below treated leaves, and root biomass. Each separate plant part was dried and oxidized using a  
281 biological oxidizer (Model OX500, R. J. Harvey Instrument Co., USA). The released  $^{14}\text{C}$ -CO<sub>2</sub>  
282 was collected by a  $^{14}\text{C}$  trapping cocktail (OX161, R.J. Harvey Instrument Co., USA).  
283 Radioactivity was quantified by LSC. One individual per timepoint was left intact, dried, and  
284 used for phosphor imaging (Typhoon Trio, GE Healthcare). Dried plants were separated and  
285 oxidized in the same manner as described above after imaging.

286 The experiment was repeated. Percent absorption and translocation was calculated as  
287 follows from Figueiredo et al. (2018) and maximum percent absorption was determined using a  
288 method described by Kniss et al. (2011) in R.

$$\%H_{\text{abs}} = [({}^{14}\text{C ot}) / ({}^{14}\text{C ot} + {}^{14}\text{C wl})] \times 100$$
$$\%H_{\text{tr}} = 100 - [({}^{14}\text{C al}) / ({}^{14}\text{C al} + {}^{14}\text{C ot}) \times 100]$$

289 Where “% $H_{\text{abs}}$ ” is percent absorption of [ $^{14}\text{C}$ ]-fluroxypyr ester, “ $^{14}\text{C ot}$ ” is the sum DPM from the  
290 oxidation of all plant parts and “ $^{14}\text{C ot} + {}^{14}\text{C wl}$ ” is the sum DPM from the oxidation of all plant  
291 parts and counts washed from the treated leaf. For herbicide translocation studies, “% $H_{\text{tr}}$ ” is  
292 percent translocation of [ $^{14}\text{C}$ ]-fluroxypyr ester out of the treated leaf through the rest of the plant,  
293 “ $^{14}\text{C al}$ ” is the DPM [ $^{14}\text{C}$ ]-fluroxypyr ester counted in the treated leaf.

294

## 295 2.7 *Fluroxypyr Metabolism*

296 Fluroxypyr metabolism was evaluated by treating Flur-R and J01-S plants as perviously  
297 described. Plants were sprayed with fluroxypyr while two leaves were protected from the spray  
298 solution. Those protected leaves were then treated with five 1  $\mu\text{L}$  drops of the spray solution  
299 spiked with 25 kBq [ $^{14}\text{C}$ ]-fluroxypyr. The time course was the same as previously described with  
300 four repetitions per timepoint. Treated leaves were removed and washed as previously described.

301 The washed treated leaves were placed back with the remaining whole-plant tissue and flash  
302 frozen in liquid nitrogen. Whole plants were then finely ground in a glass test tube with liquid  
303 nitrogen and a glass rod. Five mL extraction solution (90% water, 9% acetonitrile, 1% acetic  
304 acid) was added to each tube and samples were shaken for 30 min. The extraction solution was  
305 transferred to a 0.45 µm filter tube which was rinsed with an additional 5 mL extraction buffer  
306 and centrifuged at ~2600×g for 10 min to separate liquid from ground plant material. The  
307 extraction buffer that passed through the 0.45 µm filter was transferred to a C-18 cartridges  
308 preconditioned with 1 mL 100% acetonitrile (Waters Co., Sep-Pak Plus). Using a vacuum  
309 manifold, the extraction buffer was pulled through the solid phase extraction cartridge. Bond  
310 solutes were eluted from the C18 cartridge with 5 mL 100% acetonitrile and samples were then  
311 evaporated to dryness in a fume hood. Solvent A (500 µL) consisting of 10% acetonitrile and 1%  
312 formic acid was added to each tube. Each sample was filtered through 25 µm nylon filters  
313 (Nalgene) into an injection vial with a 500 µL insert. High Pressure Liquid Chromatography  
314 (HPLC) (Hitachi Instruments, Inc.,) was used to separate radiolabelled fluroxypyr-ester,  
315 fluroxypyr acid and metabolites.. The HPLC was equipped with a C-18 column (4.6 mm by 150  
316 mm column, Zorbax Eclipse XDB-C18, Agilent Technologies) and inline radio-detector  
317 (FlowStar LB 513, Berthold Technologies GmbH & Co.) with a YG-150-U5D solid scintillation  
318 flow cell (150 µL). The injection volume was 200 µL. Radiolabelled fluroxypyr-ester had a  
319 retention time of 9.8 min, while fluroxypyr acid had a retention time of 2.8 minutes (protocol  
320 published on protocols.io at [dx.doi.org/10.17504/protocols.io.kqdg39yopg25/v1](https://doi.org/10.17504/protocols.io.kqdg39yopg25/v1)).

321

## 322 *2.8 Plant Material and Treatment for RNA Sequencing*

323 Seeds from lines Flur-R, 9425, and J01-S were treated as described above, in similar  
324 growing conditions. When the plants reached 7-10 cm tall, 20 of the most uniform seedlings  
325 from each line were treated as follows: All plants were sprayed with water and 0.01 g meristem  
326 tissue was harvested for the untreated RNA-sequencing timepoint. Tissue was flash frozen in  
327 liquid nitrogen. The same twenty plants per line were treated 24 h later with 157 g ae ha<sup>-1</sup>  
328 fluroxypyr, the labeled rate to control kochia. Approximately 0.01 g of meristem tissue was  
329 harvested at 3 and 10 h after fluroxypyr treatment for the remaining two RNA-sequencing  
330 timepoints. Herbicide and water applications were made with a track sprayer as described in  
331 section 2.2. All plants were in the vegetative stage, except for one Flur-R individual and three

332 J01-S individuals, which were in the early flowering stage at the time of tissue harvest. After 30  
333 days, resistance response was measured and four individuals per timepoint per line were selected  
334 for RNA-sequencing.

335

### 336 *2.9 RNA Extraction, Sequencing and Quantification*

337 The RNA-sequencing experiment was conducted first by extracting total RNA following  
338 the protocols in the QIAGEN RNeasy plant mini kit in six batches containing two individuals of  
339 each line to minimize batch effects. The kit was used to extract RNA from the top three fully  
340 expanded apical meristem leaves of Flur-R, 9425, and J01-S of 5-7 cm tall kochia at 0, 3, and 10  
341 h after 157 g ai ha<sup>-1</sup> fluroxypyr treatment. Final elution volume was 30 µL. Total RNA samples  
342 were diluted to a range of 500-10,000 pg µL<sup>-1</sup> for quality check using an Agilent ScreenTape.  
343 Samples that had a RIN score above 6 were submitted to BGI Technologies for quality check  
344 following their sample submission guidelines. Following quality check by BGI, 30 samples were  
345 used for sequencing. From the total RNA, mRNA enrichment was performed by rRNA  
346 depletion. Reverse transcription of the mRNA was performed with random N6 primers followed  
347 by end repair and A-tail and adapter ligation to the fragments. After PCR amplification, single  
348 strand separation and single-strand circularization were conducted to sequence paired end 100  
349 base pair fragments with the BGISEQ sequencing platform. In total, 2.8 billion reads were  
350 produced, resulting in 92-97 million 100 bp reads per sample.

351

### 352 *2.10 Differential Expression and Variant Analysis*

353 Individual fasta files were uploaded to the remote research computing resource  
354 SUMMIT (Jonathon Anderson 2017) and files were quality checked with FastQC (version  
355 0.11.9). Adapters were trimmed by BGI Bioinformatics company after sequencing and quality  
356 check. Reads were aligned to the *Bassia scoparia* coding sequence version 2 (Hall et al. 2023)  
357 using HISAT2 (version 2.2.0 (Kim et al. 2019)). Reads were assigned to features using  
358 featureCounts in the Subread package (version 2.0.1, Liao et al. 2014). Differential expression  
359 was conducted with resultant reads for each gene feature using the DESeq2 package (version  
360 1.28.1) in the statistical software R (version 4.0.2 (R Core Team 2020)). Reads were transformed  
361 to logarithmic fold change log<sub>2</sub> and compared across biological replicates for each population.  
362 For each population, the untreated condition was compared to either the 3 or 10 h timepoint to

363 determine expression. Mean normalized counts per gene, an adjusted pvalue of  $< 0.05$ , and log<sub>2</sub>  
364 fold change  $> 0.5$  were the pre-filtering parameters used by DESeq2 for optimal significant  
365 genes below the false discovery rate (FDR) of  $< 0.05$ .

366 Sorted and indexed bam files were run through the variant calling software Platypus  
367 (version 0.8.1 (Rimmer et al. 2014)) to detect single and mono-nucleotide polymorphisms, short  
368 and long indels, as well as chromosome rearrangement. The output file was used with the  
369 software SnpEff (version 4.3 (Cingolani et al. 2012)) to annotate the variants called from  
370 Platypus and to provide effect predictions. Specific genes annotated with involvement in the  
371 auxin signaling pathway or metabolic herbicide resistance were targeted for variant analysis by  
372 checking chosen genes against a merged variant file for all individuals of each population.  
373 Presence or absence of variants were validated with Integrative Genomics Viewer (IGV)  
374 (Robinson et al. 2017).

375

### 376 **3. Results**

#### 377 *3.1 Fluroxypyr and Dicamba Dose Response*

378 Flur-R was confirmed to be fluroxypyr resistant based on change in height (Figure 2A)  
379 and percent survival (Figure 2B) at 30 days after treatment (DAT), with 75% survival up to 628  
380 g ae ha<sup>-1</sup> of fluroxypyr (Figure 2B). Flur-R was approximately 40 times more resistant than the  
381 susceptible population J01-S and 36 times more resistant than 9425 (Table 1). The population  
382 9425, which was previously reported to be fluroxypyr resistant (LeClere et al. 2018) was  
383 subsequently shown to have weak fluroxypyr resistance (Wu et al. 2020). Our results show 9425  
384 had less than 25% survival at 157 g ae ha<sup>-1</sup> fluroxypyr (Figure 2B) and had similar reduction in  
385 height as the known susceptible population J01-S (Figure 2A). The LD<sub>50</sub> ratios for J01-S and  
386 9425 were not statistically different from 1, indicating that 9425 is not resistant to fluroxypyr at  
387 field rates. Furthermore, Flur-R was susceptible to dicamba (Figure 2C), with 8% survival at 70  
388 g ae ha<sup>-1</sup> and an LD<sub>50</sub> of 56 g ae ha<sup>-1</sup>. Flur-R is approximately seven times more susceptible than  
389 9425 to dicamba (Table 1).

390

#### 391 *3.2 Glyphosate, Atrazine, and Chlorsulfuron Single Rate Screening*

392 No Flur-R or J01-S individuals survived glyphosate (870 g ae ha<sup>-1</sup>) or atrazine (2240 g ai  
393 ha<sup>-1</sup>) treatments; however, 94% ( $\pm 0.5\%$ ) of the Flur-R population and 7% ( $\pm 0.5\%$ ) of J01-S

394 individuals survived chlorsulfuron ( $137 \text{ g ai ha}^{-1}$ ). This indicates that there is multiple resistance  
395 in this fluroxypyr resistant population. Two target site mutations were identified in a SNP  
396 analysis of RNA-sequencing data that confer ALS resistance, including a proline 197 to  
397 threonine mutation and a tryptophan 574 to leucine mutation in the *ALS* gene (Tranel and Wright  
398 2002) (SI Figure 1).

399

### 400 3.3 KASP

401       Kompetitive allele specific PCR (KASP) was used to genotype individuals using allelic  
402 discrimination to determine whether or not Flur-R individuals contained the G127N *IAA16*  
403 mutation reported by LeClere et al. (2018). Specific fluorophore sequences were assigned to  
404 each forward primer, which generated a fluorescent signal to determine which allele was present  
405 in the kochia DNA sample. Relative Fluorescence Units (RFU) were measured to determine  
406 which of the fluorophore sequences amplified for each sample (Figure 3A). Of the twenty  
407 verified fluroxypyr-resistant individuals tested from the Flur-R population, 10 individuals  
408 displayed high RFU for the HEX labeled primer, indicating they had a homozygous wildtype  
409 genotype. There were six individuals that displayed approximately equal RFU for both alleles,  
410 indicating heterozygous individuals for G127N *IAA16*. Two known susceptible wild type  
411 controls were included (kochia lines J01-S, 7710), as well as one homozygous mutant resistant  
412 control (9425). These results indicate that the asparagine-127 *IAA16* mutant allele is not essential  
413 for fluroxypyr resistance, as most individuals were homozygous for the wildtype glycine-127  
414 *IAA16* allele and were resistant to fluroxypyr. The dicamba resistance asparagine-127 *IAA16*  
415 allele is present and segregating in the Flur-R population.

416

### 417 3.4 Fluroxypyr Absorption, Translocation, and Metabolism

418       We investigated differences in [ $^{14}\text{C}$ ]-fluroxypyr ester absorption and translocation  
419 between fluroxypyr-resistant line Flur-R and fluroxypyr-susceptible J01-S. For each of the two  
420 lines, two meristem leaves per individual were treated with [ $^{14}\text{C}$ ]-fluroxypyr ester. Differential  
421 absorption and translocation were investigated by partitioning all individuals into four plant  
422 sections. Radioactivity was quantified in each section using biological oxidation and liquid  
423 scintillation counting. Maximum percent absorption of  $\sim 3.33 \text{ kBq } [^{14}\text{C}]\text{-fluroxypyr ester}$  for  
424 Flur-R was 91.99% ( $\pm 3.14$ ), and for J01-S was 85% ( $\pm 3.13$ ). Percent recovery of radioactivity



425 was >75% for all samples, except two samples per line at 192h which were  $\geq 50\%$ . No significant  
426 differences in maximum absorption between Flur-R and J01-S were found (pvalue = 0.155)  
427 (Figure 4A). The time (h) after treatment in which 90% of the herbicide is absorbed based on the  
428 model in R was not statistically different between 12 h ( $\pm 2.15$ ) for Flur-R, and 9.7 h ( $\pm 2.34$ )  
429 for J01-S (pvalue = 0.47). There were no differences in translocation of [ $^{14}\text{C}$ ]-fluroxypyr ester  
430 from the treated leaf to the rest of the plant between Flur-R and J01-S (Figure 4B and C).

431 Whole plant metabolites were extracted for [ $^{14}\text{C}$ ]-fluroxypyr ester metabolism studies.  
432 Analysis of metabolites was conducted using an HPLC equipped with a C18 column. [ $^{14}\text{C}$ ]-  
433 fluroxypyr ester and acid standards were analyzed using an HPLC to determine retention time.  
434 Analysis of the proportion of [ $^{14}\text{C}$ ]-fluroxypyr ester in each population showed a significant  
435 difference at 12 h. The overall proportion of [ $^{14}\text{C}$ ]-fluroxypyr ester was lower in Flur-R than J01-  
436 S, supporting rapid conversion from the [ $^{14}\text{C}$ ]-fluroxypyr ester to biologically active [ $^{14}\text{C}$ ]-  
437 fluroxypyr acid or other [ $^{14}\text{C}$ ]-fluroxypyr metabolites (Figure 5). In Flur-R, the high amount of  
438 [ $^{14}\text{C}$ ]-fluroxypyr acid at 12 h was significantly reduced by 48 h, showing rapid conversion from  
439 to other fluroxypyr metabolites (Figure 5B). At 96 h and 192 h, the proportion of unknown  
440 metabolites numbered 4 and 2 were higher or uniquely present in Flur-R compared to J01-S  
441 (Figure 5D and F). This suggests that formation and flux of these metabolites is catalyzed by a  
442 process that is more active in Flur-R than J01-S and may play a role in reducing concentrations  
443 of phytotoxic [ $^{14}\text{C}$ ]-fluroxypyr acid.

444

### 445 3.5 Differential Expression Analysis

446 To analyze the transcriptome of Flur-R, we sequenced RNA from 4 plants each of  
447 fluroxypyr resistant Flur-R, and two fluroxypyr susceptible lines J01-S and 9425. BGI Seq was  
448 used to obtain between 91 and 95 million clean reads per sample (BGI Bioinformatics, San Jose,  
449 CA). Q20 scores were between 96–98%. Alignment was made to the coding sequence of the  
450 *Bassia scoparia* genome assembly version 2 (Hall et al. 2023) using HISAT2 (version 2.1.0), and  
451 alignment ranged between 59 - 63% for all individuals. Percent unmapped reads ranged between  
452 46 – 51%, and percent uniquely mapped genes ranged from 43 – 48%. Approximately 4% of  
453 reads were multi-mapped (SI Table 1). Following alignment and differential expression with  
454 DESeq2, a Wald test was used to obtain p-values, which were adjusted using the Benjamini-  
455 Hochberg method. Filtering parameters included samples with an adjusted p-value < 0.05 and



456 log<sub>2</sub> fold change > 0.5. The false discovery rate (FDR) was < 0.05. We identified 231 unique  
457 genes that had higher expression in Flur-R compared to both 9425 and J01-S at the untreated  
458 timepoint (Figure 6). Because we identified differential metabolism in Flur-R, we explored the  
459 hypothesis that genes related to herbicide metabolism may have differential regulation or be  
460 highly expressed at the untreated timepoint in Flur-R. Of these 231 highly expressed genes in  
461 Flur-R at the untreated timepoint, there were six ABC transporters of both class B and G,  
462 including genes homologous to *ABCG31-like* (*Bs.00g217020.m01*), two similar ABCB28  
463 annotated genes (*Bs.00g454440.m01*, *Bs.00g282300.m01*), two isoforms of *ABCG34*  
464 (*Bs.00g184080.m01*, *Bs.00g184080.m02*), and *ABCG29* (*Bs.00g251290.m01*). There were five  
465 CYP450 annotated genes between two families, the CYP71 family (*CYP82D47*  
466 [*Bs.00g486870.m01*], *CYP96A15* [*Bs.00g541440.m01*], *CYP71D10/11* [*Bs.00g051830.m01*],  
467 Ent-kaurene oxidase [*Bs.00g184110.m01*],) and the CYP85 family (*CYP90C1/D1*  
468 [*Bs.00g245700.m01*]). Several types of glucosyltransferases were expressed, such as UDP-  
469 glucosyltransferase 73B2 (*Bs.00g142060.m01*), two isoforms of UDP-glucuronosyl/UDP-  
470 glucosyltransferase 89A2-like (*Bs.00g480980.m01*, *Bs.00g480980.m02*), and UDP-  
471 glycosyltransferase 87A1 (*Bs.00g061050.m01*) (Table 2).

472 When analyzing the treated timepoints within Flur-R, J01-S, and 9425, 188 (3 h after  
473 treatment [HAT] vs untreated) and 300 genes (10 HAT vs untreated) were upregulated in  
474 response to fluroxypyr treatment in all three lines (Figure 7A and B). Of those shared  
475 upregulated genes, auxin responsive genes encoding proteins such as GH3.2  
476 (*Bs.00g477580.m01*), Ethylene responsive transcription factors, Small auxin-up RNAs (SAURs),  
477 Aux/IAAs, and ACS (*Bs.00g478760.m01*) were among them, indicating that all three kochia  
478 lines perceived fluroxypyr and had transcriptional activation of these auxin responsive genes  
479 following fluroxypyr treatment (SI Figure 2). The Ethylene responsive transcription factors,  
480 *GH3*, and *ACS* were in the top 20 genes with the highest fold change through the 3 HAT vs  
481 untreated and 10 HAT vs untreated timepoints in Flur-R, J01-S, and 9425 (Tables 3, 4, 5). Two  
482 isoforms of the IAA cellular transporter PIN were upregulated in 9425 at 10 HAT  
483 (*Bs.00g190770.m01* and *Bs.00g190770.m02*), but the response in Flur-R and J01-S did not meet  
484 the differential expression filtering criteria and therefore the response was not statistically  
485 different following fluroxypyr treatment (Figure 8). Within the Flur-R line at 3 HAT vs  
486 untreated, there were 278 uniquely upregulated genes and 303 at 10 HAT vs untreated (Figure

487 7A and B). Some unique auxin-induced genes such as *SAURs* and *ARF11* were upregulated in  
488 Flur-R, but six additional ABC transporters of class G, two ABC transporters of class C, one  
489 ABC transporter of class A, six additional UDP-glucosyltransferases (GTs), and three sugar  
490 transporters were upregulated following fluroxypyr treatment (expression data not shown).  
491 CYP450s *CYP81B2* (*Bs.00g431990.m01*), *CYP82D47*, and *CYP71A9* (*Bs.00g241110.m01*) were  
492 induced by fluroxypyr treatment, as well as four Glutathione s-transferases (GSTs) in Flur-R at 3  
493 and 10 HAT compared to the untreated timepoint.

494 When the downregulated 3 and 10 HAT timepoints were contrasted with the untreated  
495 timepoint within each line, Flur-R, J01-S, and 9425 identified 104 and 718 common fluroxypyr  
496 downregulated genes for the 3 and 10 HAT vs untreated timepoints, respectively (Figure 7C and  
497 D). Twelve of these shared genes were related to photosystem I and II at 10 HAT. Transcripts  
498 encoding key proteins related to photosynthetic electron transport such as Chlorophyll A-B  
499 binding protein (*Bs.00g240870.m01*, *Bs.00g240870.m02*) and ATP synthase  
500 (*Bs.00g432500.m01*) were downregulated in all three lines and were present in the top 20  
501 downregulated genes for all three lines (Tables 6, 7, 8). Two chlorophyll biosynthesis regulator  
502 genes encoding Early light induced protein-1 (*Bs.00g421070.m01*, *Bs.00g420960.m01*) were  
503 uniquely downregulated and among the genes with the highest downregulation in both  
504 susceptible lines. These proteins play a role in preventing oxidative stress and excess  
505 accumulation of free chlorophyll (Hutin et al. 2003). Additionally, four Cellulose synthase genes  
506 (*Bs.00g015170.m01*, *Bs.00g015170.m02*, *Bs.00g056700.m01*, *Bs.00g260720.m01*) were  
507 downregulated in both susceptible lines and are of interest due to the role cellulose plays in cell  
508 wall structural support. Genes uniquely downregulated at 10 HAT in Flur-R included two  
509 additional photosystem II subunit genes (*Bs.00g059220.m01*, *Bs.00g338570.m01*) as well as  
510 genes encoding several synthases such as Terpene synthase (*Bs.00g074880.m01*), Polyprenyl  
511 synthetase (*Bs.00g449610.m01*), Strictosidine synthase (*Bs.00g057800.m01*),  
512 Phosphomethylpyrimidine synthase (*Bs.00g253210.m01*), Aminodeoxychorismate (ADC)  
513 synthase (*Bs.00g135570.m01*), and ABA biosynthesis gene *NCED2* (*Bs.00g024060.m01*).

514

### 515 3.6 Variant Analysis

516 Our decision criteria to determine resistance-conferring sequence variant candidates were  
517 that all four Flur-R individuals from the RNA-seq experiment must have the variant. The

518 candidate variant also must be absent in the two S lines (9425 and J01-S). Of the 147 genes  
519 annotated as CYP450s in the kochia genome, there were no unique variants in the Flur-R line.  
520 There were 37 genes annotated as having an Aux/IAA domain or function, and 21 genes with an  
521 ARF domain or function. Of these genes, three genes contained a nonsynonymous mutation or a  
522 deletion. *ARF19/7* (*Bs.00g057730.m01*), one of five transcriptional activators in the ARF family,  
523 had two nonsynonymous mutations (Gly446Ser; Leu486Ile) and two single codon deletions (SI  
524 Figure 3A). A protein annotated as *ARF3* (*Bs.00g076170.m01*) also known as ETTIN (ETT)  
525 showed one nonsynonymous homozygous variant (Leu293Ser), where three J01-S individuals  
526 were heterozygous for the variant found in Flur-R, one was homozygous, and the remaining four  
527 9425 were wildtype. *Aux/IAA4-like* (*Bs.00g107340.m01*) displayed one nonsynonymous variant  
528 (Glu52Arg) in a non-conserved region 6-10 bases N terminal of the Aux/IAA Domain II  
529 described by Ramos et al. (2001) (SI Figure 3B). We also determined there were no variants in  
530 any proteins annotated as AFB or TIR1 proteins that were unique to Flur-R and met our specified  
531 criteria, and there were no mutations in the 18 LRR rich C terminus where Aux/IAA and auxin  
532 are reported to bind (Villalobos et al. 2012).

533

#### 534 **4. Discussion and Conclusion**

535 Both fluroxypyr resistant line Flur-R and two susceptible lines 9425 and J01-S had up-  
536 regulation of auxin regulated genes in response to fluroxypyr that was similar to the auxin mimic  
537 herbicide gene expression response in Arabidopsis (Gleason et al. 2011; Goda et al. 2004). The  
538 increased expression of auxin responsive genes following fluroxypyr treatment suggests that  
539 fluroxypyr is being perceived similarly by all three lines and supports our findings that target-site  
540 variants found in *Aux/IAA4* and *ARF19/7* are likely not the cause of the fluroxypyr resistance  
541 response in Flur-R. Specifically in *ARF19/7*, the identified variants are predicted to have no  
542 significant effect on fluroxypyr binding due to their position in the variable middle region  
543 described by Ulmasov et al. (1999) (SI Figure 3A). Although we did find a Flur-R homozygous  
544 variant in *ARF3*, the region boundaries of *ARF3* are unlike most other ARFs in that it does not  
545 contain Domain III/IV, two key domains for interaction with Aux/IAA proteins relating to auxin  
546 gene expression. *ARF3* does function in some auxin related pathways (reviewed by Liu et al.  
547 (2014)) but the protein has been described to function as a repressor of several proteins causing  
548 inhibition of cytokinin activity, a plant hormone that often partners with IAA (Zhang et al. 2018).

549 While we cannot be certain that the variant in *ARF3* does not contribute indirectly to fluroxypyr  
550 resistance or affect cytokinin levels in the plant, due to the *ARF3* described function, there is  
551 stronger support for metabolism being the underlying cause of resistance. Additionally, if  
552 variants were found that affected auxin-mimic perception or binding, such as the *IAA16*  
553 Gly127Asn mutation described by LeClere et al. (2018), the expected auxin-response gene  
554 expression would likely not be induced as reported by Pettinga et al. (2018) in the 9425 line  
555 when tested with the auxin-mimic herbicide dicamba.

556 The translocation data suggest that fluroxypyr, being primarily in its acid form based on  
557 the 6 h metabolism results, is moving symplastically throughout the plant as a phloem mobile  
558 herbicide (Schober et al. 1986). Transcripts for two IAA transporter (PIN) isoforms were  
559 upregulated in the susceptible lines 9425 and J01-S when treated with fluroxypyr, suggesting that  
560 PINs can transport fluroxypyr in a similar manner to the transport of IAA. Based on the lack of  
561 differences in translocation between Flur-R and J01-S, these two identified PIN transporters are  
562 not moving phytotoxic fluroxypyr acid throughout the resistant or susceptible plants at a  
563 different rate. Other transporters such as ATP binding cassettes (ABCs) in class B can move  
564 multiple substrates including xenobiotics. Some members of this large protein family serve as  
565 auxin transporters (Cho and Cho 2013). ABC transporters from both class B and G were  
566 upregulated in Flur-R following fluroxypyr treatment, none of which have been individually  
567 implicated in herbicide resistance. Several class G transporters are involved in auxin homeostasis  
568 and other phytohormone transport, cellular detoxification of heavy metals, and pathogen  
569 resistance (Dhara and Raichaudhuri 2021; Gräfe and Schmitt 2021). The functional suite of ABC  
570 class G transporters in kochia is yet to be fully described, though cellular export of fluroxypyr  
571 conjugates is not outside the scope of known activity for class G transporters.

572 In Flur-R, abscisic acid (ABA) biosynthesis gene *NCED2* transcript expression decreased  
573 over a 10 h time period, contrasting the results from the two susceptible lines in which *NCED6*  
574 transcripts had increased expression at 3 h in all three lines (Figure 8). The implications of  
575 decreased *NCED2* expression in the resistant line are currently unknown, though some reports  
576 show an increased level of response from *NCED* genes following various auxin-mimic  
577 applications (Kraft et al. 2007; McCauley et al. 2020; Raghavan et al. 2005). Among these ABA  
578 related downregulated genes, seven subunits of Photosystem I and four subunits of Photosystem  
579 II are downregulated in all three lines following fluroxypyr application suggesting that

580 fluroxypyr may affect light energy harvesting as part of its mechanism of action. These findings  
581 are consistent with the findings of McCauley et al. (2020).

582         Of the five CYP450s constitutively expressed in Flur-R compared to either 9425 or J01-  
583 S, *CYP71D10/11* has been implicated in metabolic herbicide resistance to fenoxaprop-p-ethyl  
584 (Bai et al. 2020). Other CYP450s in the CYP71 family have been described as shikimate and  
585 shikimate intermediate modifiers (Jun et al. 2015), including Ent-kaurene oxidase (CYP701  
586 subfamily) which functions in gibberellin biosynthesis; its overexpression causes partial  
587 resistance to plant growth retardant uniconazole-P (Miyazaki et al. 2011). *CYP81B2*  
588 (*Bs.00g431990.m01*) in transgenic tobacco metabolized the phenylurea herbicide chlortoluron  
589 after the application of auxin-mimic 2,4-D. The same study also identified its involvement in  
590 secondary metabolite biosynthesis (Ohkawa et al. 1999). The other two treatment induced  
591 CYP450s in Flur-R, *CYP82D47* and *CYP71A9-like*, have no described role in herbicide  
592 resistance, however, there are a significant number of CYP450s involved in herbicide  
593 metabolism in the CYP71 family, to which they both belong (Gion et al. 2014; Siminszky et al.  
594 1999; Xiang et al. 2006).

595         The final constitutively expressed CYP450 in the Flur-R line, *CYP90C1/D1*, belongs to  
596 the CYP85 family which is implicated in modification of cyclic terpenes and sterols in  
597 brassinosteroid, abscisic acid and gibberellin biosynthesis (Jun et al. 2015; Ohnishi et al. 2006;  
598 Ohnishi et al. 2012). It is not unusual for CYP450s to be multifunctional (Bernhardt 2006), and  
599 their function can often be attributed to the selectivity of some herbicides, extensively reviewed  
600 by Dimaano and Iwakami (2021).

601         We investigated fluroxypyr resistance using herbicide physiology experiments as well as  
602 RNA-sequencing and identified metabolic detoxification as a plausible explanation of fluroxypyr  
603 resistance in kochia line Flur-R. Two of the four metabolites are accounted for, having been  
604 reported by the Environmental Protection Agency (EPA 2010). The action of conjugation by  
605 GSTs or GTs may explain one of the two remaining undescribed metabolites presented, which  
606 were both rapidly converted from fluroxypyr acid throughout the time course in Flur-R. Given  
607 the high expression of five GSTs and eight GTs in both untreated and treatment induced  
608 conditions, formation of secondary metabolic structures is possible. Following CYP450 activity  
609 via *O*-glucosylation, fluroxypyr-tripeptide GST or -sugar conjugates can be catalyzed by GST or  
610 UDP-glucosyl transferase (Ludwig-Müller 2011). GSTs and GTs can glycosylate plant hormones

611 and xenobiotics to influence bioactivity, transport, solubility and can be pumped out of the cell  
612 via ABC transporters (Li et al. 2001; Moons 2005). Subsequent sequestration of the non-  
613 phytotoxic herbicide via ABC transporter may also play a role in the resistance response in Flur-  
614 R, though more work is needed to fully understand the metabolic response following fluroxypyr  
615 application in Flur-R.

616

## 617 **5. Future Work**

618 Future work elucidating the fluroxypyr resistance mechanism involves *in vitro* and *in*  
619 *vivo* testing of the five candidate GSTs, eight GTs, and eight CYP450s. Metabolite identification  
620 via LCMS/MS is crucial next step to determine the metabolic path of the fluroxypyr molecule.  
621 Other future studies include genetic mapping of fluroxypyr resistance via test crosses and either  
622 Quantitative Trait Loci (QTL) or bulk-segregant analysis with resistant Flur-R and susceptible  
623 J01-S, which will provide chromosomal location of resistance gene(s) (Montgomery et al. 2023).  
624 Biochemical studies using P450 and GST inhibitors will indicate whether the enhanced  
625 fluroxypyr metabolism can be reversed. Metabolic information paired with mapping and ongoing  
626 inheritance studies will be a strong contribution to the understanding of auxin-mimic resistance  
627 and characterization of fluroxypyr resistance in this population of kochia. Identifying causal  
628 resistance genes in auxin-mimic resistant kochia populations will allow us to document the  
629 evolution of new resistance genes and predict patterns of gene flow, following the model set by  
630 Ravet et al. (2021) for gene flow of glyphosate resistance in kochia.

631

## 632 **Data Availability:**

633 The data underlying this article are available in the Gene Expression Omnibus at  
634 <https://www.ncbi.nlm.nih.gov/geo/query/acc.cgi?acc=GSE179578>, and can be accessed  
635 with GEO Accession GSE179578.

636

## 637 **Author Contributions Using CRediT Author Statements**

638 **OT:** Writing, visualization, data curation, investigation, formal analysis, validation,  
639 methodology **EP:** Resources, methodology **EW:** Resources **AA:** Investigation **WK:**



640 Investigation **FD:** Methodology, supervision, resources **SN:** Methodology, resources **TG:**

641 Writing, supervision, conceptualization.

642

## 643 **Acknowledgements**

644 This research was supported in part by the Colorado Wheat Administrative Committee,  
645 by Corteva Agrisciences, and by the USDA National Institute of Food and Agriculture, Hatch  
646 project COL00783 to the Colorado State University Agricultural Experiment Station.

## 647 **References**

- 648 Aboul-Maaty N. A.-F., and H. A.-S. Oraby. (2019) Extraction of high-quality genomic DNA  
649 from different plant orders applying a modified CTAB-based method. *Bulletin of the*  
650 *National Research Centre* 43:25.
- 651 Bai S., Y. Zhao, Y. Zhou, M. Wang, Y. Li, X. Luo, and L. Li. (2020) Identification and  
652 expression of main genes involved in non-target site resistance mechanisms to  
653 fenoxaprop-p-ethyl in *Beckmannia syzigachne*. *Pest Manag Sci* 76:2619-2626.
- 654 Bernhardt R. (2006) Cytochromes P450 as versatile biocatalysts. *J Biotechnol* 124:128-45.
- 655 Busi R., D. E. Goggin, I. M. Heap, M. J. Horak, M. Jugulam, R. A. Masters, R. M. Napier, D. S.  
656 Riar, N. M. Satchivi, J. Torra, P. Westra, and T. R. Wright. (2018) Weed resistance to  
657 synthetic auxin herbicides. *Pest Manag Sci* 74:2265-2276.
- 658 Cho M., and H. T. Cho. (2013) The function of ABCB transporters in auxin transport. *Plant*  
659 *Signal Behav* 8:e22990.
- 660 Cingolani P., A. Platts, L. L. Wang, M. Coon, T. Nguyen, L. Wang, S. J. Land, X. Lu, and D. M.  
661 Ruden. (2012) A program for annotating and predicting the effects of single nucleotide  
662 polymorphisms, SnpEff: SNPs in the genome of *Drosophila melanogaster* strain w1118;  
663 iso-2; iso-3. *Fly* 6:80-92.
- 664 Delye C. (2013) Unravelling the genetic bases of non-target-site-based resistance (NTSR) to  
665 herbicides: a major challenge for weed science in the forthcoming decade. *Pest Manag*  
666 *Sci* 69:176-187.
- 667 Dhara A., and A. Raichaudhuri. (2021) ABCG transporter proteins with beneficial activity on  
668 plants. *Phytochemistry* 184:112663.
- 669 Dimaano N. G., and S. Iwakami. (2021) Cytochrome P450-mediated herbicide metabolism in  
670 plants: current understanding and prospects. *Pest Manag Sci* 77:22-32.
- 671 EPA. (2010) Analytical method for fluroxypyr-MHE and its metabolites, fluroxypyr acid,  
672 fluroxypyr-DCP and fluroxypyr-MP in water. Available at [epa.gov](http://epa.gov).
- 673 Figueiredo M. R., H. Barnes, C. M. Boot, A. B. T. De Figueiredo, S. J. Nissen, F. E. Dayan, and  
674 T. A. Gaines. (2022a) Identification of a novel 2, 4-D metabolic detoxification pathway  
675 in 2, 4-D-resistant waterhemp (*Amaranthus tuberculatus*). *J Agr Food Chem* 70:15380-  
676 15389.
- 677 Figueiredo M. R. A., L. J. Leibhart, Z. J. Reicher, P. J. Tranel, S. J. Nissen, P. Westra, M. L.  
678 Bernards, G. R. Kruger, T. A. Gaines, and M. Jugulam. (2018) Metabolism of 2,4-  
679 dichlorophenoxyacetic acid contributes to resistance in a common waterhemp  
680 (*Amaranthus tuberculatus*) population. *Pest Manag Sci* 74:2356-2362.



- 681 Figueiredo M. R. d., A. Küpper, J. M. Malone, T. Petrovic, A. B. T. d. Figueiredo, G.  
682 Campagnola, O. B. Peersen, K. V. Prasad, E. L. Patterson, and A. S. Reddy. (2022b) An  
683 in-frame deletion mutation in the degron tail of auxin coreceptor IAA2 confers resistance  
684 to the herbicide 2, 4-D in *Sisymbrium orientale*. Proc Natl Acad Sci USA  
685 119:e2105819119.
- 686 Gaines T. A., S. O. Duke, S. Morran, C. A. G. Rigon, P. J. Tranel, A. Kopper, and F. E. Dayan.  
687 (2020) Mechanisms of evolved herbicide resistance. J Biol Chem 295:10307-10330.
- 688 Geddes C. M., M. L. Owen, T. E. Ostendorf, J. Y. Leeson, S. M. Sharpe, S. W. Shirriff, and H. J.  
689 Beckie. (2021a) Herbicide diagnostics reveal multiple patterns of synthetic auxin  
690 resistance in kochia (*Bassia scoparia*). Weed Technol:1-28.
- 691 Geddes C. M., T. E. Ostendorf, M. L. Owen, J. Y. Leeson, S. M. Sharpe, S. W. Shirriff, and H. J.  
692 Beckie. (2021b) Fluroxypyr-resistant kochia [*Bassia scoparia* (L.) AJ Scott] confirmed in  
693 Alberta. Can J Plant Sci 102:437-441.
- 694 Geddes C. M., M. M. Pittman, L. M. Hall, A. K. Topinka, S. M. Sharpe, J. Y. Leeson, and H. J.  
695 Beckie. (2022) Increasing frequency of multiple herbicide-resistant kochia (*Bassia*  
696 *scoparia*) in Alberta. Can J Plant Sci.
- 697 Gion K., H. Inui, K. Takakuma, T. Yamada, Y. Kambara, S. Nakai, H. Fujiwara, T. Miyamura,  
698 H. Imaishi, and H. Ohkawa. (2014) Molecular mechanisms of herbicide-inducible gene  
699 expression of tobacco CYP71AH11 metabolizing the herbicide chlorotoluron. Pestic  
700 Biochem Phys 108:49-57.
- 701 Gleason C., R. C. Foley, and K. B. Singh. (2011) Mutant analysis in Arabidopsis provides  
702 insight into the molecular mode of action of the auxinic herbicide dicamba. Plos One  
703 6:e17245.
- 704 Goda H., S. Sawa, T. Asami, S. Fujioka, Y. Shimada, and S. Yoshida. (2004) Comprehensive  
705 comparison of auxin-regulated and brassinosteroid-regulated genes in Arabidopsis. Plant  
706 Physiol 134:1555-73.
- 707 Goggin D. E., S. Bringans, J. Ito, and S. B. Powles. (2019) Plasma membrane receptor-like  
708 kinases and transporters are associated with 2,4-D resistance in wild radish. Ann Bot.  
709 Gräfe K., and L. Schmitt. (2021) The ABC transporter G subfamily in *Arabidopsis thaliana*. J  
710 Exp Bot 72:92-106.
- 711 Grossmann K. (2010) Auxin herbicides: current status of mechanism and mode of action. Pest  
712 Manag Sci 66:113-20.
- 713 Guilfoyle T. J. (1999) Auxin-regulated genes and promoters. Biochemistry and molecular  
714 biology of plant hormones.
- 715 Hall N., J. Chen, C. A. Saski, P. Westra, T. A. Gaines, and E. Patterson. (2023) FHY3/FAR1  
716 transposable elements generate adaptive genetic variation in the *Bassia scoparia* genome.  
717 bioRxiv:2023.05. 26.542497.
- 718 Heap I. M. (2021) International survey of herbicide resistant weeds.
- 719 Hutin C., L. Nussaume, N. Moise, I. Moya, K. Kloppstech, and M. Havaux. (2003) Early light-  
720 induced proteins protect Arabidopsis from photooxidative stress. Proc Natl Acad Sci  
721 USA 100:4921-6.
- 722 Jha P., V. Kumar, and C. A. Lim. (2015) Variable response of kochia [*Kochia scoparia* (L.)  
723 Schrad.] to auxinic herbicides dicamba and fluroxypyr in Montana. Can. J. Plant Sci.  
724 95:965-972.

- 725 Jonathon Anderson P. J. B., Daniel Milroy, Peter Ruprecht, Thomas Hauser, and Howard Jay  
726 Siegel. (2017) Deploying RMACC Summit: an HPC resource for the rocky mountain  
727 region. PEARC17.
- 728 Jun X., X.-y. WANG, and W.-z. GUO. (2015) The cytochrome P450 superfamily: key players in  
729 plant development and defense. *J of Int Agric* 14:1673-1686.
- 730 Kim D., J. M. Paggi, C. Park, C. Bennett, and S. L. Salzberg. (2019) Graph-based genome  
731 alignment and genotyping with HISAT2 and HISAT-genotype. *Nat Biotech* 37:907-915.
- 732 Knezevic S. Z., J. C. Streibig, and C. Ritz. (2007) Utilizing R software package for dose-  
733 response studies: the concept and data analysis. *Weed Technol* 21:840-848.
- 734 Kniss A. R., J. D. Vassios, S. J. Nissen, and C. Ritz. (2011) Nonlinear regression analysis of  
735 herbicide absorption studies. *Weed Sci* 59:601-610.
- 736 Kraft M., R. Kuglitsch, J. Kwiatkowski, M. Frank, and K. Grossmann. (2007) Indole-3-acetic  
737 acid and auxin herbicides up-regulate 9-cis-epoxycarotenoid dioxygenase gene  
738 expression and abscisic acid accumulation in cleavers (*Galium aparine*): interaction with  
739 ethylene. *J Exp Bot* 58:1497-503.
- 740 Kumar V., R. S. Currie, P. Jha, and P. W. Stahlman. (2019a) First report of kochia (*Bassia*  
741 *scoparia*) with cross-resistance to dicamba and fluroxypyr in western Kansas. *Weed*  
742 *Technol* 33:335-341.
- 743 Kumar V., P. Jha, M. Jugulam, R. Yadav, and P. W. Stahlman. (2019b) Herbicide-resistant  
744 kochia (*Bassia scoparia*) in North America: a review. *Weed Sci* 67:4-15.
- 745 LeClere S., C. Wu, P. Westra, and R. D. Sammons. (2018) Cross-resistance to dicamba, 2,4-D,  
746 and fluroxypyr in *Kochia scoparia* is endowed by a mutation in an AUX/IAA gene. *Proc*  
747 *Natl Acad Sci USA* 115:E2911-E2920.
- 748 Lee S., S. Sundaram, L. Armitage, J. P. Evans, T. Hawkes, S. Kepinski, N. Ferro, and R. M.  
749 Napier. (2014) Defining binding efficiency and specificity of auxins for  
750 SCF(TIR1/AFB)-Aux/IAA co-receptor complex formation. *ACS Chem Biol* 9:673-82.
- 751 Li Y., S. Baldauf, E.-K. Lim, and D. J. Bowles. (2001) Phylogenetic analysis of the UDP-  
752 glycosyltransferase multigene family of *Arabidopsis thaliana*. *J Biol Chem* 276:4338-  
753 4343.
- 754 Liao, Y., G. K. Smyth, and W. Shi. (2014) featureCounts: an efficient general purpose program  
755 for assigning sequence reads to genomic features. *Bioinformatics* 30:923-930.
- 756 Liu X., T. T. Dinh, D. Li, B. Shi, Y. Li, X. Cao, L. Guo, Y. Pan, Y. Jiao, and X. Chen. (2014)  
757 AUXIN RESPONSE FACTOR 3 integrates the functions of AGAMOUS and APETALA  
758 2 in floral meristem determinacy. *Plant J* 80:629-641.
- 759 Ludwig-Müller J. (2011) Auxin conjugates: their role for plant development and in the evolution  
760 of land plants. *J Exp Bot* 62:1757-1773.
- 761 McCauley C. L., S. A. M. McAdam, K. Bhide, J. Thimmapuram, J. A. Banks, and B. G. Young.  
762 (2020) Transcriptomics in *Erigeron canadensis* reveals rapid photosynthetic and  
763 hormonal responses to auxin herbicide application. *J Exp Bot* 71:3701-3709.
- 764 Miyazaki S., T. Katsumata, M. Natsume, and H. Kawaide. (2011) The CYP701B1 of  
765 *Physcomitrella patens* is an ent-kaurene oxidase that resists inhibition by uniconazole-P.  
766 *Febs Lett* 585:1879-83.
- 767 Montgomery J. S., S. Morran, D. R. MacGregor, J. S. McElroy, P. Neve, C. Neto, M. M. Vila-  
768 Aiub, M. V. Sandoval, A. I. Menéndez, J. M. Kreiner, L. Fan, A. L. Caicedo, P. J.  
769 Maughan, B. A. B. Martins, J. Mika, A. Collavo, J. Aldo Merotto, N. K. Subramanian,  
770 M. V. Bagavathiannan, L. Cutti, M. M. Islam, B. S. Gill, R. Cicchillo, R. Gast, N. Soni,

- 771 T. R. Wright, G. Zastrow-Hayes, G. May, J. M. Malone, D. Sehgal, S. S. Kaundun, R. P.  
772 Dale, B. J. Vorster, B. Peters, J. Lerchl, P. J. Tranel, R. Beffa, M. Jugulam, K. Fengler,  
773 V. Llaca, E. L. Patterson, and T. Gaines. (2023) The International Weed Genomics  
774 Consortium: Community resources for weed genomics research.  
775 bioRxiv:2023.07.19.549613.
- 776 Moons A. (2005) Regulatory and functional interactions of plant growth regulators and plant  
777 glutathione S-transferases (GSTs). *Vitam Horm* 72:155-202.
- 778 Murphy B. P., and P. J. Tranel. (2019) Target-site mutations conferring herbicide resistance.  
779 *Plants* 8.
- 780 Ohkawa H., H. Tsujii, and Y. Ohkawa. (1999) The use of cytochrome P450 genes to introduce  
781 herbicide tolerance in crops: a review. *Pestic Sci* 55:867-874.
- 782 Ohnishi T., A.-M. Szatmari, B. Watanabe, S. Fujita, S. Bancos, C. Koncz, M. Lafos, K. Shibata,  
783 T. Yokota, and K. Sakata. (2006) C-23 hydroxylation by Arabidopsis CYP90C1 and  
784 CYP90D1 reveals a novel shortcut in brassinosteroid biosynthesis. *Plant Cell* 18:3275-  
785 3288.
- 786 Ohnishi T., B. Godza, B. Watanabe, S. Fujioka, L. Hategan, K. Ide, K. Shibata, T. Yokota, M.  
787 Szekeres, and M. Mizutani. (2012) CYP90A1/CPD, a brassinosteroid biosynthetic  
788 cytochrome P450 of Arabidopsis, catalyzes C-3 oxidation. *J Biol Chem* 287:31551-  
789 31560.
- 790 Paponov I. A., M. Paponov, W. Teale, M. Menges, S. Chakrabortee, J. A. Murray, and K. Palme.  
791 (2008) Comprehensive transcriptome analysis of auxin responses in Arabidopsis. *Mol*  
792 *Plant* 1:321-37.
- 793 Perrot-Rechenmann C. (2010) Cellular responses to auxin: division versus expansion. *Cold*  
794 *Spring Harb Perspect Biol* 2:a001446.
- 795 Pettinga D. J., J. Ou, E. L. Patterson, M. Jugulam, P. Westra, and T. A. Gaines. (2018) Increased  
796 chalcone synthase (CHS) expression is associated with dicamba resistance in *Kochia*  
797 *scoparia*. *Pest Manag Sci* 74:2306-2315.
- 798 Preston C., D. S. Belles, P. H. Westra, S. J. Nissen, and S. M. Ward. (2009) Inheritance of  
799 resistance to the auxinic herbicide dicamba in kochia (*Kochia scoparia*). *Weed Sci* 57:43-  
800 47.
- 801 R Core Team (2020). R: A language and environment for statistical computing. R Foundation for  
802 Statistical Computing, Vienna, Austria. URL <http://www.R-project.org/>.
- 803 Raghavan C., E. K. Ong, M. J. Dalling, and T. W. Stevenson. (2005) Effect of herbicidal  
804 application of 2,4-dichlorophenoxyacetic acid in Arabidopsis. *Funct Integr Genomics*  
805 5:4-17.
- 806 Ramos J. A., N. Zenser, O. Leyser, and J. Callis. (2001) Rapid degradation of auxin/indoleacetic  
807 acid proteins requires conserved amino acids of domain II and is proteasome dependent.  
808 *Plant Cell* 13:2349-2360.
- 809 Ravet K., C. D. Sparks, A. L. Dixon, A. Küpper, E. P. Westra, D. J. Pettinga, P. J. Tranel, J.  
810 Felix, D. W. Morishita, and P. Jha. (2021) Genomic-based epidemiology reveals  
811 independent origins and gene flow of glyphosate resistance in *Bassia scoparia*  
812 populations across North America. *Mol Ecol* 30:5343-5359.
- 813 Rimmer A., H. Phan, I. Mathieson, Z. Iqbal, S. R. Twigg, A. O. Wilkie, G. McVean, and G.  
814 Lunter. (2014) Integrating mapping-, assembly-and haplotype-based approaches for  
815 calling variants in clinical sequencing applications. *Nat Genet* 46:912-918.

- 816 Robinson J. T., H. Thorvaldsdóttir, A. M. Wenger, A. Zehir, and J. P. Mesirov. (2017) Variant  
817 review with the integrative genomics viewer. *Cancer Res* 77:e31-e34.
- 818 Rosquete M. R., E. Barbez, and J. Kleine-Vehn. (2012) Cellular auxin homeostasis: gatekeeping  
819 is housekeeping. *Mol Plant* 5:772-86.
- 820 Schober A., S. McMaster, and R. Gantz. (1986) Fluroxypyr: a new environmentally compatible  
821 herbicide Proceedings-Western Society of Weed Science (USA).
- 822 Siminszky B., F. T. Corbin, E. R. Ward, T. J. Fleischmann, and R. E. Dewey. (1999) Expression  
823 of a soybean cytochrome P450 monooxygenase cDNA in yeast and tobacco enhances the  
824 metabolism of phenylurea herbicides. *Proc Natl Acad Sci USA* 96:1750-1755.
- 825 Teale W. D., I. A. Paponov, and K. Palme. (2006) Auxin in action: signalling, transport and the  
826 control of plant growth and development. *Nat Rev Mol Cell Biol* 7:847-59.
- 827 Todd O. E., M. R. Figueiredo, S. Morran, N. Soni, C. Preston, M. F. Kubeš, R. Napier, and T. A.  
828 Gaines. (2020) Synthetic auxin herbicides: finding the lock and key to weed resistance.  
829 *Plant Sci* 300:110631.
- 830 Tranel P. J., and T. R. Wright. (2002) Resistance of weeds to ALS-inhibiting herbicides: what  
831 have we learned? *Weed Sci* 50:700-712.
- 832 Ulmasov T., G. Hagen, and T. J. Guilfoyle. (1999) Activation and repression of transcription by  
833 auxin-response factors. *Proc Natl Acad Sci USA* 96:5844-5849.
- 834 Varanasi V. K., A. S. Godar, R. S. Currie, A. J. Dille, C. R. Thompson, P. W. Stahlman, and M.  
835 Jugulam. (2015) Field-evolved resistance to four modes of action of herbicides in a single  
836 kochia (*Kochia scoparia* L. Schrad.) population. *Pest Manag Sci* 71:1207-12.
- 837 Villalobos L. I. A. C., S. Lee, C. De Oliveira, A. Ivetac, W. Brandt, L. Armitage, L. B. Sheard,  
838 X. Tan, G. Parry, H. B. Mao, N. Zheng, R. Napier, S. Kepinski, and M. Estelle. (2012) A  
839 combinatorial TIR1/AFB-Aux/IAA co-receptor system for differential sensing of auxin.  
840 *Nat Chem Biol* 8:477-485.
- 841 Westra E. P., S. J. Nissen, T. J. Getts, P. Westra, and T. A. Gaines. (2019) Survey reveals  
842 frequency of multiple resistance to glyphosate and dicamba in kochia (*Bassia scoparia*).  
843 *Weed Technol* 33:664-672.
- 844 Wu C., S. LeClere, K. Liu, M. Paciorek, A. Perez-Jones, P. Westra, and R. D. Sammons. (2020)  
845 A dicamba resistance-endowing IAA16 mutation leads to significant vegetative growth  
846 defects and impaired competitiveness in kochia (*Bassia scoparia*). *Pest Manag Sci*  
847 77:795-804.
- 848 Xiang W. S., X. J. Wang, and T. R. Ren. (2006) Expression of a wheat cytochrome P450  
849 monooxygenase cDNA in yeast catalyzes the metabolism of sulfonylurea herbicides.  
850 *Pestic Biochem Phys* 85:1-6.
- 851 Xu J., X. Liu, R. Napier, L. Dong, and J. Li. (2022) Mode of action of a novel synthetic auxin  
852 herbicide halauxifen-methyl. *Agronomy* 12:1659.
- 853 Zhang K., R. Wang, H. Zi, Y. Li, X. Cao, D. Li, L. Guo, J. Tong, Y. Pan, and Y. Jiao. (2018)  
854 AUXIN RESPONSE FACTOR3 regulates floral meristem determinacy by repressing  
855 cytokinin biosynthesis and signaling. *Plant Cell* 30:324-346.
- 856 Zhao Y. (2010) Auxin biosynthesis and its role in plant development. *Annu Rev Plant Biol*  
857 61:49-64.  
858

## FIGURES

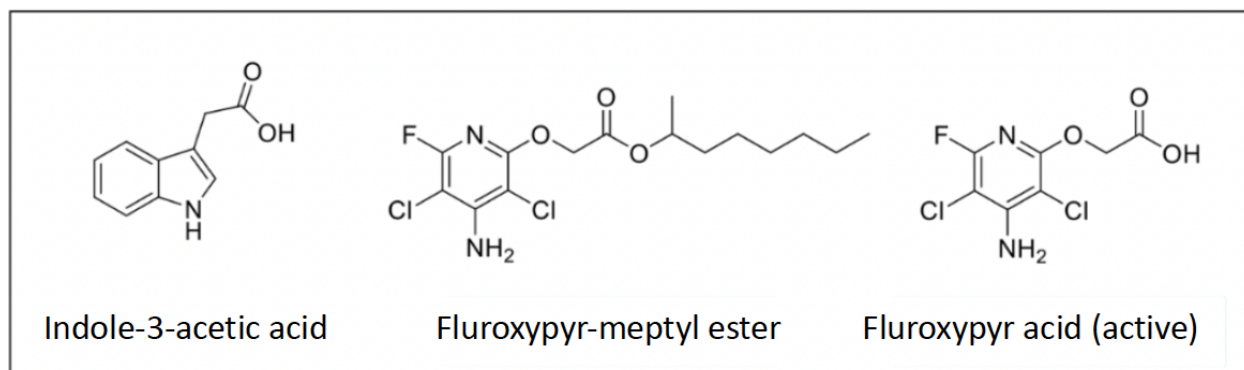

Figure 1: Chemical structure of indole-3-acetic acid (IAA), fluroxypyr-meptyl ester (fluroxypyr-ester) included in the formulated commercial products, and fluroxypyr-acid, the biologically active form of the herbicide. Deesterification of fluroxypyr-meptyl ester frees the carboxyl group shown in fluroxypyr-acid, which plays a key role in plant perception related to the auxin signaling pathway in relation to the ring structure found throughout auxin-mimic herbicide chemistry.



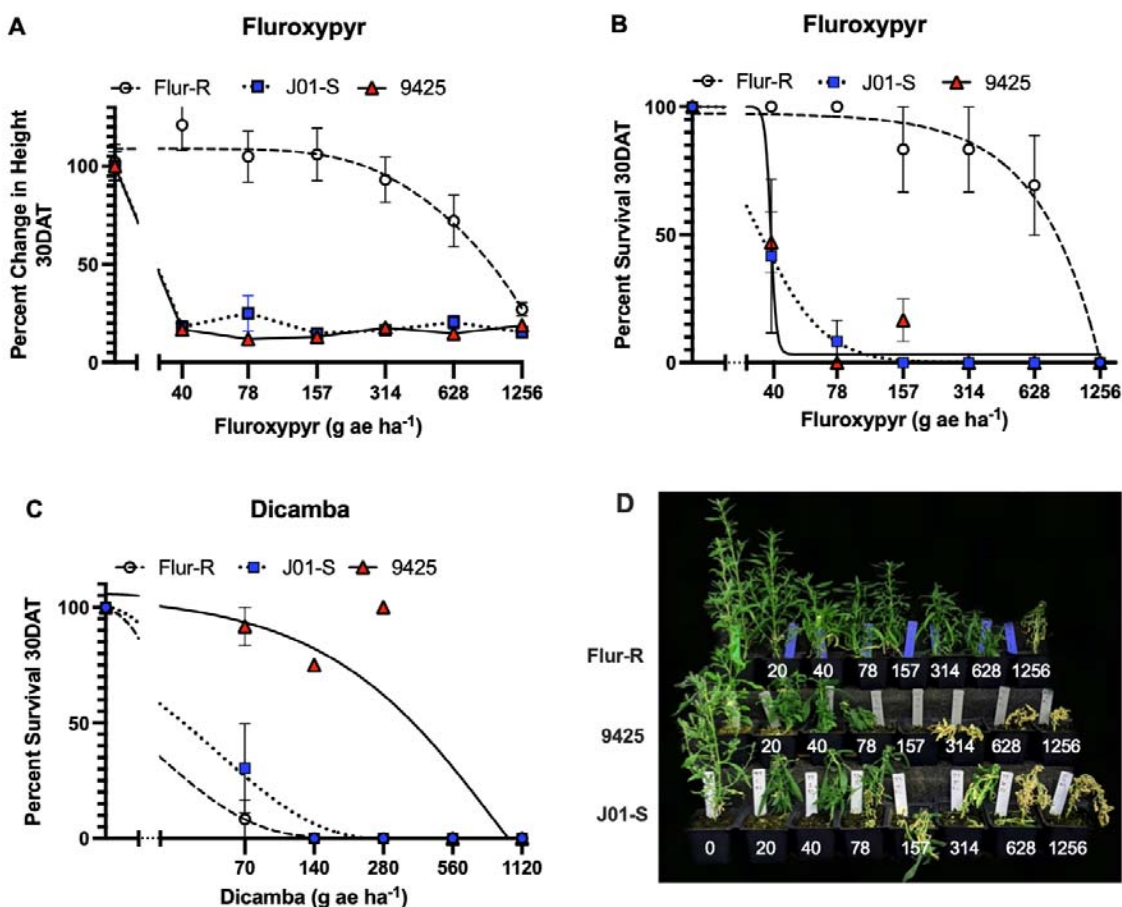

Figure 2: Dose response data for (A, B) fluroxypyr (no adjuvant) and (C) dicamba (+ 0.25% NIS) demonstrated fluroxypyr resistance and dicamba sensitivity in fluroxypyr resistant line Flur-R. X-axis is represented in a log<sub>10</sub> scale. A. Percent change in height as a percent of the untreated control 30 days after treatment with fluroxypyr showed a 25% reduction in height in Flur-R at 628 g ae ha<sup>-1</sup> (four times the label rate of 157 g ae ha<sup>-1</sup>). B. Percent survival for Flur-R with greater than 70% survival to fluroxypyr at 628 g ae ha<sup>-1</sup> (LD<sub>50</sub> = 720, p < 0.001). The population 9425 was susceptible to fluroxypyr (LD<sub>50</sub> = 20 g ae ha<sup>-1</sup>, p < 0.001). C. Flur-R was susceptible to dicamba (LD<sub>50</sub> = 56 g ae ha<sup>-1</sup>, p < 0.001) and the known dicamba-resistant line, 9425, was resistant to dicamba up to 280 g ae ha<sup>-1</sup>. Error bars represent SEM. D. Singular plants represent the average line response at each dose of fluroxypyr where 157 g ae ha<sup>-1</sup> represents the label rate.

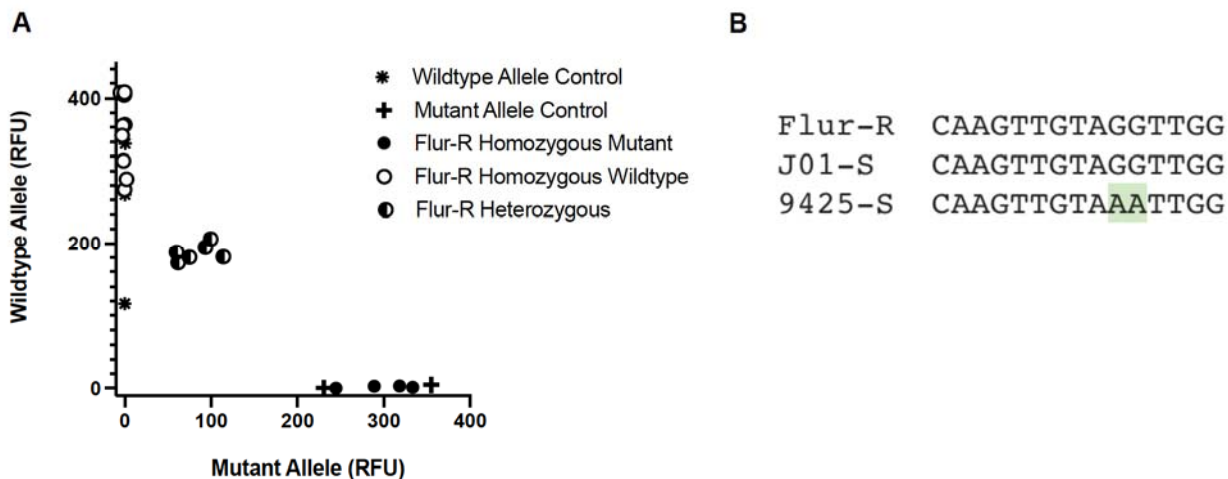

Figure 3: A. KASP assay with fluroxypyr resistant individuals sprayed with 157 g ai ha<sup>-1</sup> fluroxypyr. Wildtype allele control lines were fluroxypyr and dicamba susceptible line 7710 and J01-S. Mutant allele control was homozygous dicamba resistant line 9425. B. Consensus sequenced based on KASP and previously published sequencing data at the mutation point of interest in J01-S, Flur-R and dicamba resistant line 9425 conferring resistance to dicamba as reported by LeClere et al. 2018. The mutation from GG to AA confers a G127N change.



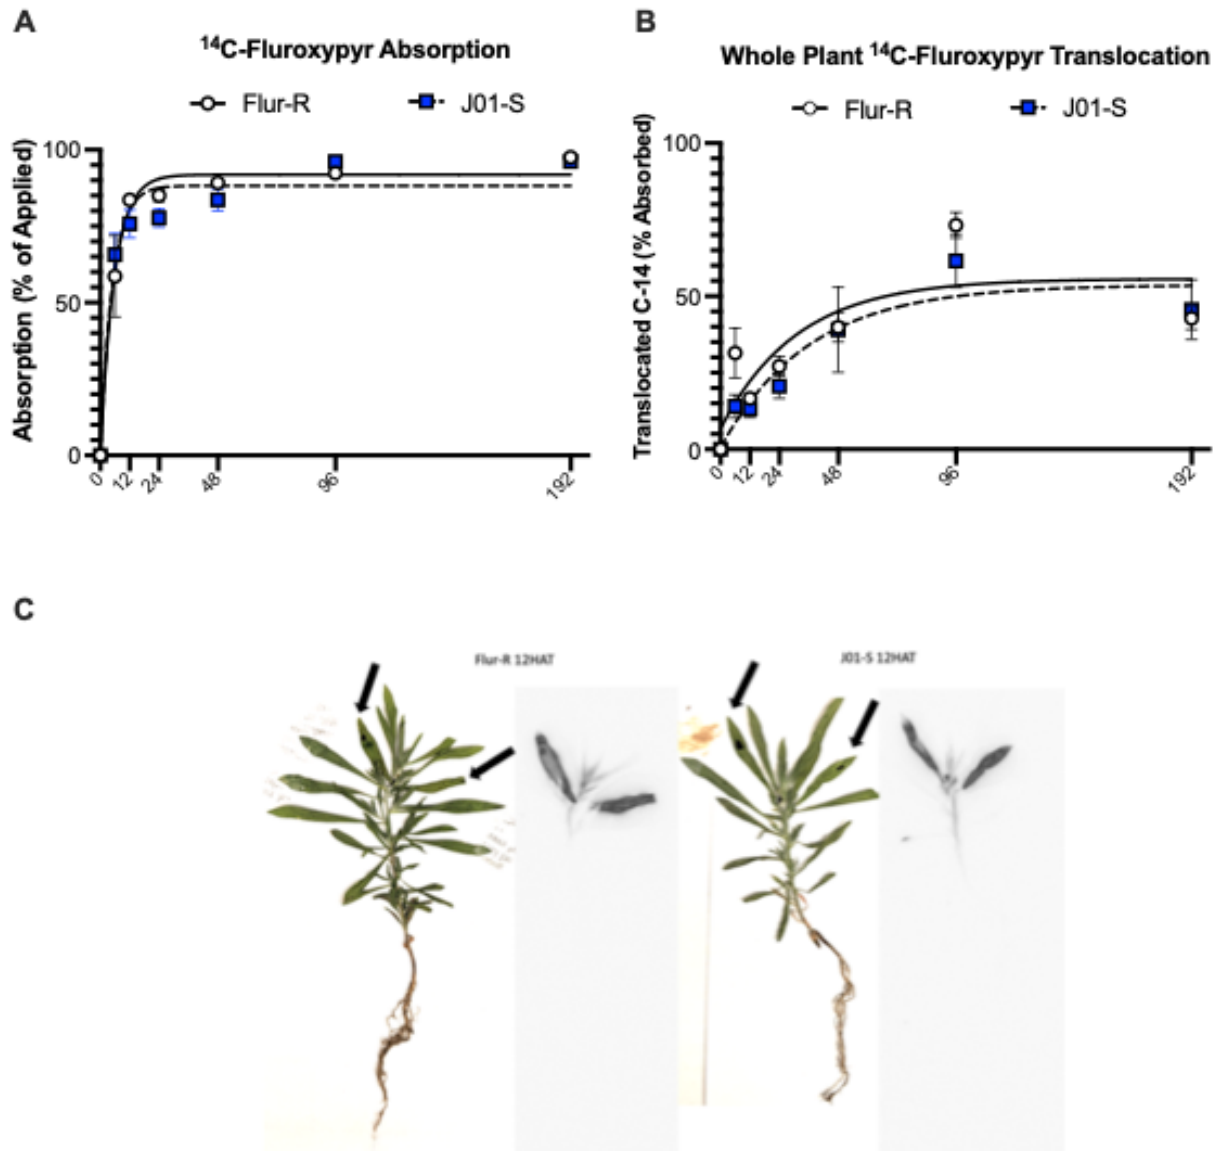

Figure 4. Whole plant absorption (A) and translocation (B) of fluroxypyr on resistant Flur-R line and susceptible line J01-S assessed over 6, 12, 24, 48, 96, and 192 h after treatment with [<sup>14</sup>C]-fluroxypyr ester. The absorption and translocation graphs depict mean percent absorption as percent of applied radiation and mean percent translocation as percent of absorbed radiation to account for slight variation in application rates, with error bars representing SEM. There were no differences in absorption or translocation of [<sup>14</sup>C]-fluroxypyr ester between Flur-R and J01-S. C. Pressed plant and phosphor-images showed translocation of [<sup>14</sup>C]-fluroxypyr ester in Flur-R (left) and J01-S (right) at 12 h, the time at which max absorption was at 90% in both lines. The black arrows mark the two treated meristem leaves on each individual. The phosphor image to the right of each pressed plant photo shows early-stage translocation of [<sup>14</sup>C]-fluroxypyr ester.

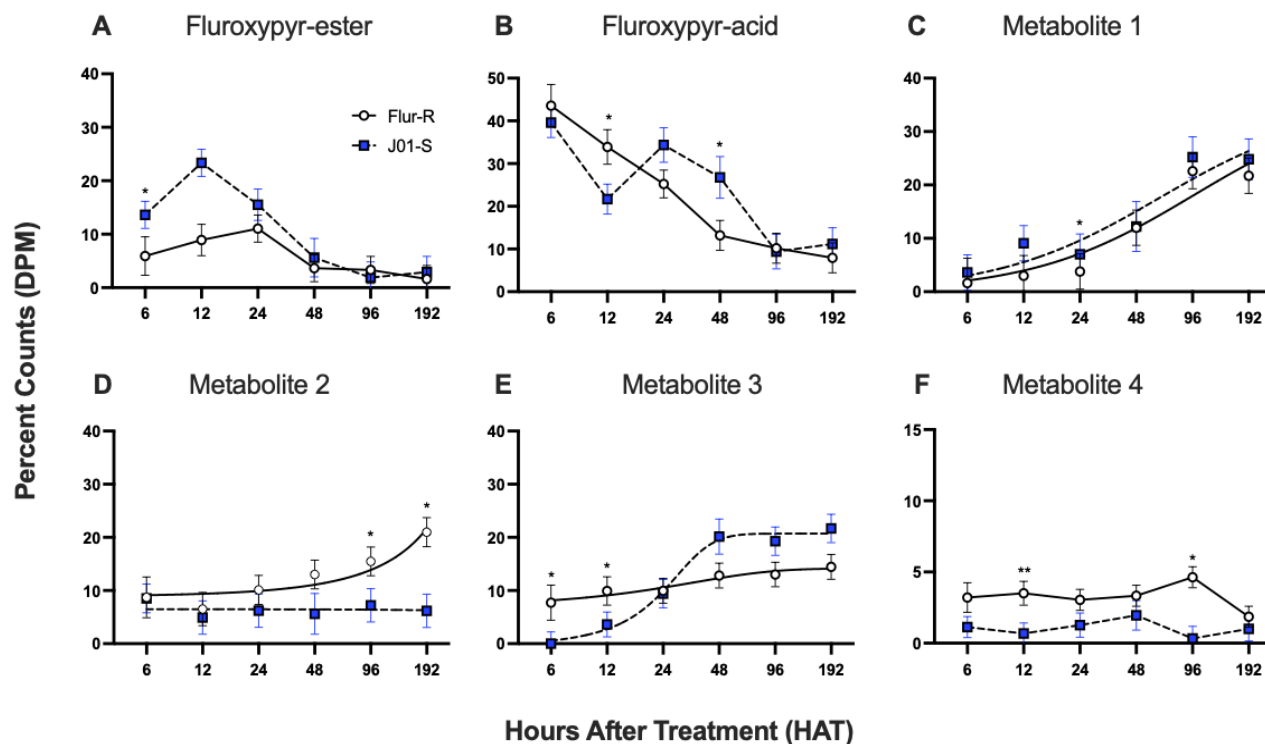

Figure 5. HPLC fluroxypyr parent and metabolite profiles over a 192 h time-course in fluroxypyr resistant kochia (*Bassia scoparia*) line Flur-R and fluroxypyr susceptible J01-S. A. Parent compound, [<sup>14</sup>C]-fluroxypyr ester (9.5 min retention). B. Biologically active compound, [<sup>14</sup>C]-fluroxypyr acid (7.7 min retention). C. Unknown metabolite 1 (4.5 min retention). D. Unknown metabolite 2 (5.8 min retention). E. Unknown metabolite 3 (6.4 min retention). F. Unknown metabolite 4 (7.2 min retention). \* P<0.05, \*\* P≤0.005, error bars represent SEM.

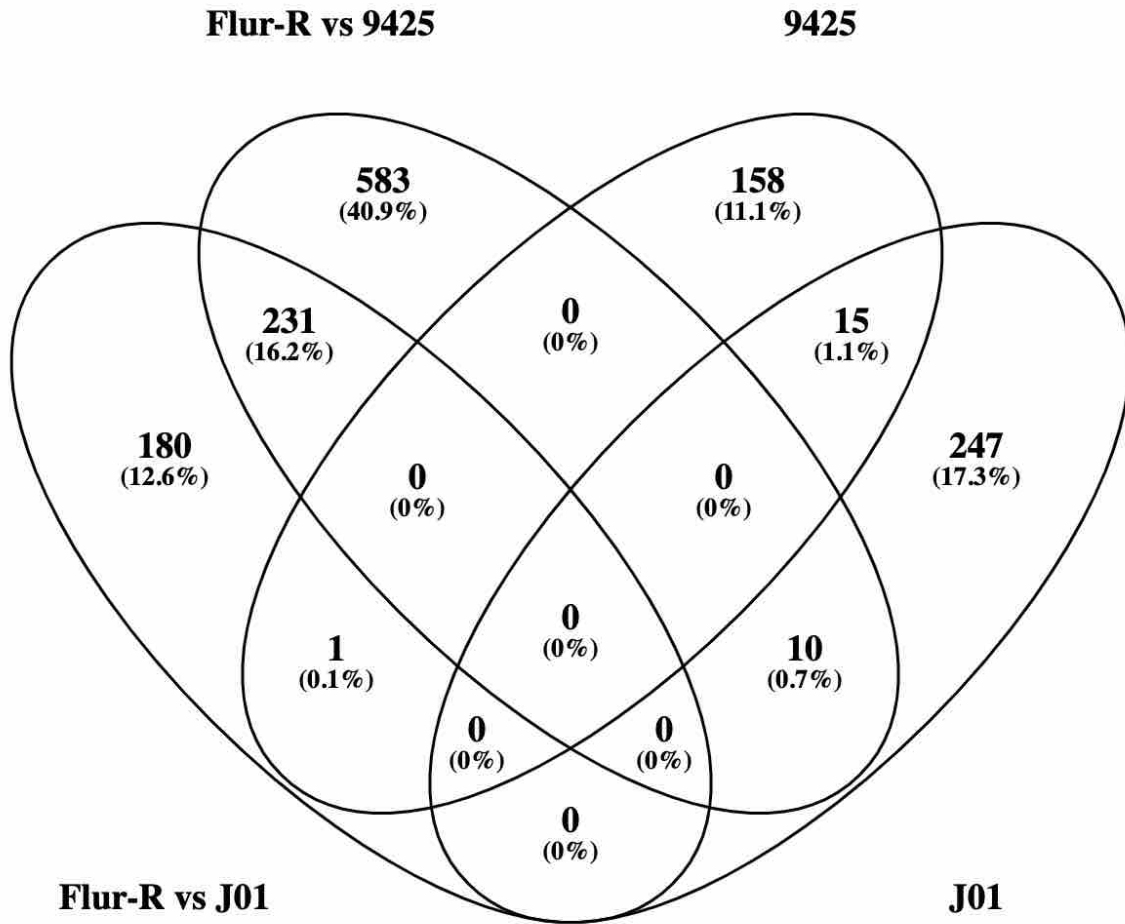

Figure 6. Venn diagram of upregulated genes between the untreated condition in Flur-R compared to both untreated conditions in fluroxypyr susceptible lines 9425-S and J01-S in DESeq2 (Flur-R vs 9425; Flur-R vs J01). Genes upregulated in both 9425-S and J01-S compared to Flur-R in DESeq2 are represented by their singular line name in the diagram (J01, 9425). Overlapping ovals represent genes that are commonly expressed at the untreated condition between comparisons.

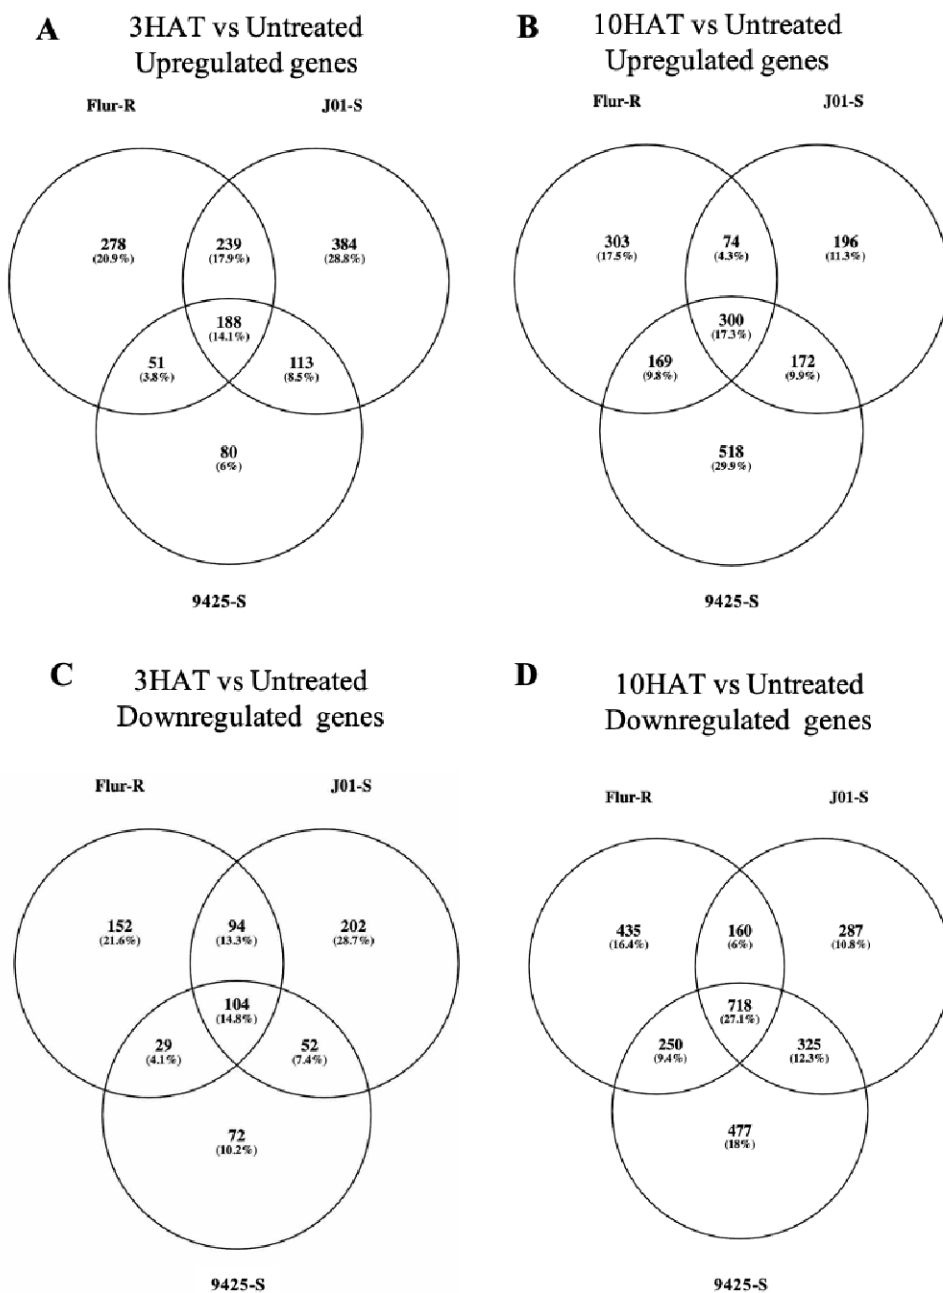

Figure 7. Number of transcripts that were either up or down regulated between the untreated condition and either 3 or 10 h after treatment (HAT) with fluroxypyr in fluroxypyr-resistant line Flur-R and susceptible lines 9425 and J01-S. A. Shared and uniquely upregulated genes at 3 HAT among and between all three lines. B. Shared and uniquely upregulated genes at 10 HAT among and between all three lines. C. Shared and uniquely downregulated genes at 3 HAT among and between all three lines. D. Shared and uniquely downregulated genes at 10 HAT among and between all three lines.

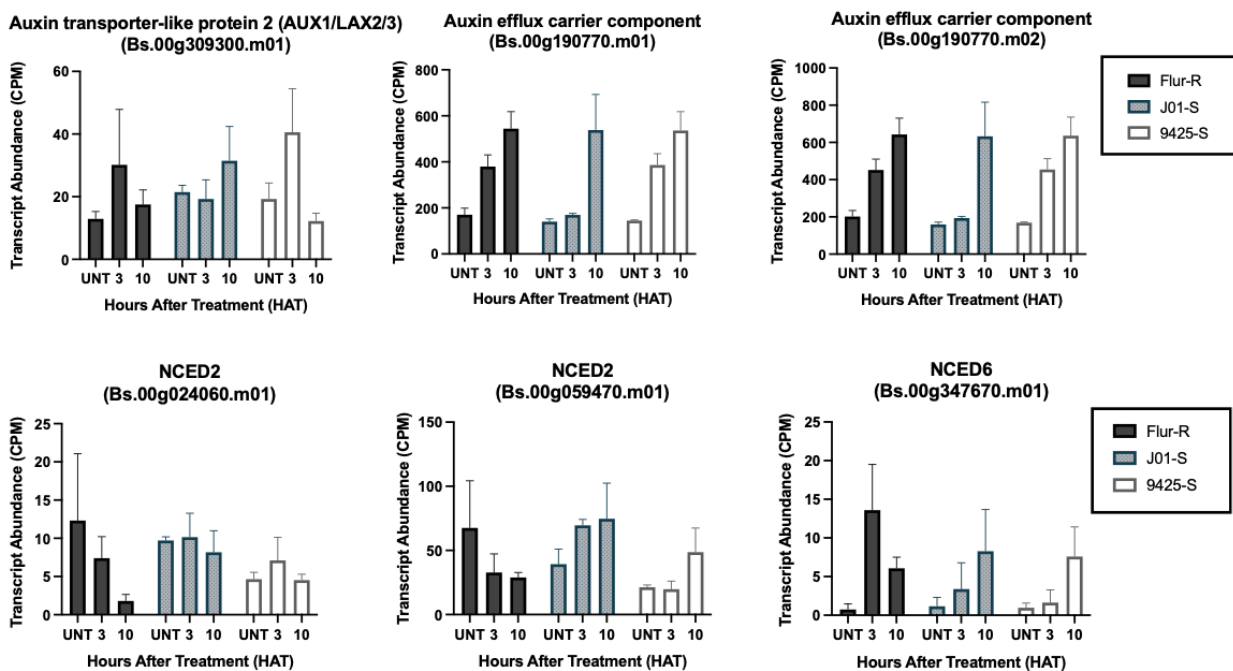

Figure 8. Expression profiles for auxin induced influx and efflux transporters and NCED in fluroxypyr-resistant kochia (*Bassia scoparia*) Flur-R, susceptible J01-S, and susceptible 9425 following differential expression analysis of RNA-Seq data. X-axis treatments: untreated, 3 h after treatment (HAT), and 10 HAT grouped by kochia line. Normalized counts on the y-axis were a result of the DESeq2 function and model fitting in R package “DESeq2”. Both isoforms of the auxin efflux carrier component were upregulated in response to fluroxypyr in the 9425 line. There were no differences in expression for the Aux/LAX transporter. NCED6 was induced at both 3 HAT and 10 HAT in Flur-R, while NCED2 was downregulated in Flur-R.

TABLES

1

2 Table 1. Parameters for fluroxypyr dose-response data in kochia (*Bassia scoparia*) populations Flur-R, 9425, and J01-S. Parameters of  
 3 the fluroxypyr and dicamba dose-responses for percent survival parameters are described in Equation 3 for Flur-R, fluroxypyr  
 4 sensitive line J01-S and fluroxypyr sensitive/dicamba resistant line 9425. Flur-R shows a significant resistance factor ratio (R/S) of 36  
 5 and 40 relative to 9425 and J01, respectively. (*b,d*) Lower and upper limits of regression parameters, respectively. (*LD<sub>50</sub>*) The dose (g  
 6 ae ha<sup>-1</sup>) of fluroxypyr where 50% mortality occurs for each population. (*R/S*) The ratio of resistant *LD<sub>50</sub>* to either susceptible *LD<sub>50</sub>* and  
 7 associated p-values.

Herbicide

| Line   | Fluroxypyr                       |                    |                                  |       |         | Dicamba                          |                    |                                  |     |         |
|--------|----------------------------------|--------------------|----------------------------------|-------|---------|----------------------------------|--------------------|----------------------------------|-----|---------|
|        | <i>b</i><br>(± SE)               | <i>d</i><br>(± SE) | <i>LD<sub>50</sub></i><br>(± SE) | R/S   | P-value | <i>b</i><br>(± SE)               | <i>d</i><br>(± SE) | <i>LD<sub>50</sub></i><br>(± SE) | R/S | P-value |
|        | -----g ae ha <sup>-1</sup> ----- |                    |                                  |       |         | -----g ae ha <sup>-1</sup> ----- |                    |                                  |     |         |
| Flur-R | 7.3<br>(8.4)                     | 94.5 (3.6)         | 720 (110.3)                      | 36-40 | <0.001  | 7.4 (5.2)                        | 100.0 (4.9)        | 56 (8.5)                         | --  | --      |
| 9425   | 8.5<br>(37.7)                    | 100.0 (8.8)        | 20<br>(1.5)                      | --    | --      | 85.1 (10.0)                      | 91.7 (2.72)        | 415 (10.0)                       | 6-7 | <0.001  |
| J01-S  | 3.1<br>(1.8)                     | 100.0 (8.8)        | 18<br>(2.7)                      | --    | --      | 9.3 (8.5)                        | 100.0 (4.93)       | 64 (5.4)                         | --  | --      |

8

9

10

11

Table 2. Genes with higher expression at the untreated timepoint in kochia (*Bassia scoparia*) line Flur-R compared to 9425 and J01-S lines at the untreated timepoint. Raw normalized counts and Log2 fold change for highly expressed ABC transporters, UDP glucosyltransferases, and cytochrome P450 monooxygenases in the fluroxypyr-resistant population Flur-R compared to either susceptible population 9425 or J01-S. Genes which are higher expressed in Flur-R compared to both susceptible populations and are denoted with † and represented with the normalized count and fold change comparison to 9425. Log2 Fold Change was calculated in DESeq2, log2 fold change standard error and adjusted *p*-value were also calculated in DESeq2. The Wald-test obtained *p*-values were adjusted using the Benjamini-Hochberg method. The FDR was < 0.05.

| Gene ID           | Mean of normalized counts |       | Fold Change | Log2 Fold Change (±SE) | P-value (adjusted) | Gene Description                                        |
|-------------------|---------------------------|-------|-------------|------------------------|--------------------|---------------------------------------------------------|
|                   | Flur-R                    | 9425  |             |                        |                    |                                                         |
| Bs.00g184080.m02  | 2258                      | 3     | 753         | 9.70 (0.75)            | 1.85E-32           | ABC-G 34 Isoform 2                                      |
| Bs.00g184080.m01  | 2147                      | 3     | 716         | 9.63 (0.75)            | 9.86E-32           | ABC-G 34 Isoform 1                                      |
| Bs.00g217020.m01† | 63                        | 0     | 63          | 8.98 (2.85)            | 1.31E-06           | ABC-G 31-like                                           |
| Bs.00g142060.m01  | 38                        | 0     | 38          | 8.02 (2.81)            | 6.52E-05           | UDP-glucosyltransferase 73B2 related                    |
| Bs.00g184110.m01  | 133                       | 2     | 67          | 6.24 (0.96)            | 3.59E-08           | CYP701 subfamily (Ent- Kaurene Oxidase)                 |
| Bs.00g282300.m01† | 108                       | 6     | 18          | 5.18 (1.47)            | 0.0028             | ABC-G 28-like                                           |
| Bs.00g480980.m01† | 510                       | 14    | 36          | 5.01 (0.63)            | 2.11E-11           | UDP-glucuronosyl/UDP-glucosyltransferase 89A2-like      |
| Bs.00g480980.m03† | 538                       | 15    | 36          | 4.99 (0.63)            | 2.72E-11           | UDP-glucuronosyl/UDP-glucosyltransferase 89A2-like      |
| Bs.00g541440.m01  | 232                       | 10    | 23          | 4.21 (0.72)            | 2.00E-06           | CYP96A15                                                |
| Bs.00g051830.m01  | 233                       | 5     | 47          | 4.03 (1.48)            | 0.0231             | CYP71D10/11                                             |
| Bs.00g454440.m01† | 276                       | 52    | 5           | 2.28 (0.44)            | 0.0003             | Putative ABC-B 28-like                                  |
| Bs.00g061050.m01  | 6018                      | 1187  | 5           | 2.08 (0.59)            | 0.027              | UDP-glycosyltransferase 87A1 related                    |
| Bs.00g251290.m01  | 1462                      | 341   | 4           | 1.98 (0.38)            | 0.0008             | ABC-G 29-like                                           |
| Bs.00g245700.m01  | 417                       | 114   | 4           | 1.72 (0.40)            | 0.0113             | CYP90C1/D1 (3-Epi-6-Deoxocathasterone 23-Monooxygenase) |
|                   | Flur-R                    | J01-S |             |                        |                    |                                                         |
| Bs.00g486870.m01  | 1847                      | 61    | 31          | 4.85 (0.55)            | 1.29E-13           | CYP82D47-like                                           |
| Bs.00g142720.m01  | 8246                      | 3606  | 2           | 1.17 (0.15)            | 0.0001             | 7-deoxyloganetin glucosyltransferase-like 85A23         |



Table 3. Top 20 upregulated genes in fluroxypyr-resistant kochia (*Bassia scoparia*) line Flur-R at 3 h after treatment (HAT) and 10 HAT compared to the untreated timepoint. Fold change was calculated using the mean of normalized counts, which was produced using the DESeq2 package in R. Log2 Fold Change was calculated in DESeq2, log2 fold change standard error and adjusted *p*-value were also calculated in DESeq2. The Wald-test obtained *p*-values were adjusted using the Benjamini-Hochberg method. The FDR was < 0.05.

| Gene ID                         | Mean of normalized counts |             | Fold Change | Log2 Fold Change ( $\pm$ SE) | P-value  | Gene Description                                          |
|---------------------------------|---------------------------|-------------|-------------|------------------------------|----------|-----------------------------------------------------------|
|                                 | Flur-R Untreated          | Flur-R 3HAT |             |                              |          |                                                           |
| Bs.00g016210.m01 <sup>j</sup> † | 0.71                      | 607         | 855         | 5.30 (0.39)                  | 1.59E-14 | Precursor of CEP13/CEP14                                  |
| Bs.00g306100.m01                | 8                         | 383         | 48          | 4.79 (0.33)                  | 2.84E-28 | Transcription Factor, MADS-Box                            |
| Bs.00g477580.m01 <sup>c</sup> † |                           |             |             | 4.63 (0.40)                  | 1.22E-35 | GH3 Family Protein                                        |
| Bs.00g523550.m01                | 20                        | 1131        | 57          | 4.57 (0.380)                 | 8.34E-24 | Reverse Transcriptase Zinc-Binding Domain                 |
| Bs.00g418990.m01                | 34                        | 1534        | 45          | 4.48 (0.37)                  | 3.11E-23 | Ethylene-Responsive Transcription Factor                  |
| Bs.00g010340.m01                | 1187                      | 24154       | 20          | 4.43 (0.28)                  | 3.94E-42 | Membrane Attack Complex Component/Perforin (MACPF) Domain |
| Bs.00g435130.m01                | 34                        | 1425        | 42          | 4.11 (0.39)                  | 2.77E-19 | Proton-Dependent Oligopeptide Transporter Family          |
| Bs.00g315820.m01                | 242                       | 7163        | 30          | 4.03 (0.37)                  | 2.01E-18 | Amino Acid Transporter                                    |
| Bs.00g520970.m01                | 4                         | 791         | 198         | 3.98 (0.47)                  | 3.34E-13 | Uncharacterized Protein                                   |
| Bs.00g419000.m01 <sup>a</sup>   | 4                         | 1779        | 445         | 3.99 (0.49)                  | 3.20E-11 | Dehydration-Responsive Element-Binding Protein 1A-Related |
| Bs.00g315840.m01                | 184                       | 5117        | 28          | 3.92 (0.38)                  | 1.28E-16 | Amino Acid Transporter                                    |
| Bs.00g301780.m01                | 650                       | 24203       | 37          | 3.90 (0.40)                  | 2.28E-17 | ABC Transporter G Family Member 40                        |
| Bs.00g087440.m01                | 17                        | 547         | 32          | 3.88 (0.40)                  | 5.86E-14 | Amino Acid Transporter                                    |
| Bs.00g181270.m02 <sup>a</sup>   | 150                       | 5353        | 36          | 3.87 (0.42)                  | 4.17E-14 | Protein NLP6-Related                                      |
| Bs.00g257560.m01                | 1                         | 330         | 330         | 3.85 (0.45)                  | 3.93E-11 | C2 Domain (Calcium/Lipid-Binding Domain, Calb)            |
| Bs.00g200680.m01                | 1                         | 80          | 80          | 3.85 (0.42)                  | 2.58E-07 | Uncharacterized Protein                                   |
| Bs.00g244620.m01                | 75                        | 1873        | 25          | 3.85 (0.34)                  | 7.44E-20 | Uncharacterized Protein                                   |
| Bs.00g301770.m01                | 65                        | 2253        | 35          | 3.82 (0.40)                  | 3.74E-16 | ABC Transporter G Family Member 40                        |
| Bs.00g428240.m01                | 3                         | 126         | 42          | 3.78 (0.42)                  | 3.22E-10 | Extended Synaptotagmin-Related                            |

| Gene ID                         | Flur-R 10        |        | Count | Log2 Fold Change (FC) | P-value  | Gene Name                                                  |
|---------------------------------|------------------|--------|-------|-----------------------|----------|------------------------------------------------------------|
|                                 | Flur-R Untreated | HAT    |       |                       |          |                                                            |
| Bs.00g036810.m01                | 750              | 16564  | 22    | 3.73 (0.36)           | 1.72E-17 | Protein Phosphatase 2C                                     |
| Bs.00g016210.m01 <sup>j</sup> † | 0.71             | 2485   | 4007  | 7.43 (0.36)           | 9.28E-23 | Precursor of CEP13/CEP14                                   |
| Bs.00g477580.m01 <sup>c</sup> † | 67               | 29708  | 443   | 6.01 (0.41)           | 6.01E-57 | GH3                                                        |
| Bs.00g239120.m01 <sup>k</sup>   | 7                | 1135   | 162   | 5.82 (0.39)           | 1.82E-33 | Aquaporin Transporter                                      |
| Bs.00g168520.m01 <sup>k</sup>   | 35               | 3260   | 93    | 5.25 (0.35)           | 1.44E-36 | Cold Regulated Protein 27                                  |
| Bs.00g168520.m02 <sup>d</sup>   | 37               | 3298   | 89    | 5.41 (0.38)           | 1.41E-43 | Cold Regulated Protein 27                                  |
| Bs.00g107600.m01                | 13               | 2990   | 230   | 5.21 (0.43)           | 7.35E-34 | Barwin-like endoglucanases                                 |
| Bs.00g370370.m01                | 3                | 495    | 65    | 5.14 (0.41)           | 1.50E-22 | Ethylene-Responsive Transcription Factor 13 Related        |
| Bs.00g431740.m01                | 33               | 4437   | 134   | 5.12 (0.44)           | 2.94E-27 | Heme-Dependent Peroxidases                                 |
| Bs.00g057300.m01                | 0.34             | 142    | 418   | 5.06 (0.49)           | 3.98E-08 | CYP71D10-like                                              |
| Bs.00g217150.m01                | 6                | 1485   | 248   | 4.92 (0.44)           | 4.39E-28 | Bet v I/Major Latex Protein                                |
| Bs.00g122020.m01                | 42               | 16883  | 393   | 4.88 (0.33)           | 2.86E-36 | Uncharacterized Protein                                    |
| Bs.00g261130.m01                | 43               | 6160   | 143   | 4.83 (0.33)           | 1.71E-23 | Bet v I/Major Latex Protein                                |
| Bs.00g291860.m01                | 0                | 153    | 153   | 4.78 (0.47)           | 7.06E-11 | Secoisolariciresinol Dehydrogenase                         |
| Bs.00g478760.m01 <sup>h</sup>   | 1                | 930    | 930   | 4.48 (0.46)           | 5.42E-19 | 1-Aminocyclopropane-1-Carboxylate Synthase 4 Related       |
| Bs.00g282410.m01                | 6                | 730    | 122   | 4.43 (0.45)           | 2.22E-19 | Cysteine-Rich Repeat Secretory Protein 38                  |
| Bs.00g056520.m01                | 532              | 16588  | 31    | 4.39 (0.33)           | 5.82E-31 | Alanine Dehydrogenase/Pyridine Nucleotide Transhydrogenase |
| Bs.00g370420.m01                | 0.37             | 76     | 205   | 4.35 (0.45)           | 5.86E-07 | Uncharacterized Protein                                    |
| Bs.00g422990.m01 <sup>d</sup>   | 4681             | 137203 | 29    | 4.28 (0.32)           | 4.34E-32 | 4-Hydroxyphenylpyruvate Dioxygenase-like                   |
| Bs.00g020740.m01                | 5                | 709    | 142   | 4.27 (0.48)           | 1.40E-16 | WRKY Transcription Factor                                  |
| Bs.00g148640.m01 <sup>m</sup>   | 1158             | 32325  | 28    | 4.26 (0.30)           | 7.67E-36 | 2-Oxoisovalerate Dehydrogenase Subunit Alpha 2             |

<sup>a</sup> Shared between J01-S 3 HAT and Flur-R 3 HAT top 20 upregulated genes

<sup>c</sup> Shared between 9425-S 10 HAT, J01-S 10 HAT and Flur-R 3/10 HAT top 20 upregulated genes

<sup>d</sup> Shared between J01-S 10 HAT and Flur-R 3 HAT upregulated top 20 upregulated genes

<sup>h</sup> Shared between 9425-S 3 HAT, Flur-R 10 HAT and J01-S 10 HAT top 20 upregulated genes

<sup>j</sup> Shared between 9425-S 10 HAT, Flur-R 3 HAT /10 HAT and J02-S 10 HAT top 20 upregulated genes

<sup>k</sup> Shared between 9425-S 10 HAT, Flur-R 10 HAT and J01-S 10 HAT top 20 upregulated genes

<sup>m</sup> Shared between 9425-S 10 HAT and Flur-R 10 HAT top 20 upregulated genes

† Shared between Flur-R 3 HAT/10 HAT top 20 upregulated genes

Table 4. Top 20 upregulated genes in fluroxypyr-susceptible kochia (*Bassia scoparia*) line J01-S at 3 h after treatment (HAT) and 10 HAT compared to the untreated timepoint. Fold change was calculated using the mean of normalized counts which was produced using the DESeq2 package in R. Log2 Fold Change was calculated in DESeq2, log2 fold change standard error and adjusted *p*-value were also calculated in DESeq2. The Wald-test obtained *p*-values were adjusted using the Benjamini-Hochberg method. The FDR was <0.05.

| Gene ID                       | Mean of normalized counts |             | Fold Change | Log2 Fold Change ( $\pm$ SE) | P-value  | Gene Description                                          |
|-------------------------------|---------------------------|-------------|-------------|------------------------------|----------|-----------------------------------------------------------|
|                               | J01-S Untreated           | J01-S 3 HAT |             |                              |          |                                                           |
| Bs.00g058350.m01              | 4                         | 3428        | 763         | 7.33 (0.40)                  | 2.01E-40 | NADH Oxidoreductase-Related                               |
| Bs.00g144030.m01              | 173                       | 40872       | 237         | 6.42 (0.44)                  | 1.39E-37 | Glycoside Hydrolase, Family 16                            |
| Bs.00g487370.m01              | 3                         | 694         | 247         | 5.84 (0.46)                  | 1.66E-17 | Alpha/Beta Hydrolase Fold                                 |
| Bs.00g397110.m01              | 0                         | 494         | 494         | 5.46 (0.51)                  | 1.71E-09 | Zinc Finger, RING/FYVE/PHD-Type                           |
| Bs.00g435120.m01              | 31                        | 2720        | 87          | 5.44 (0.37)                  | 2.45E-36 | Proton-Dependent Oligopeptide Transporter Family          |
| Bs.00g419000.m01 <sup>a</sup> | 0                         | 762         | 762         | 5.43 (0.53)                  | 4.51E-10 | AP2/ERF                                                   |
| Bs.00g122020.m01 <sup>†</sup> | 20                        | 10546       | 515         | 5.43 (0.46)                  | 4.17E-37 | Uncharacterized Protein                                   |
| Bs.00g142660.m01              | 232                       | 13906       | 60          | 5.39 (0.32)                  | 6.56E-47 | Exordium-Like                                             |
| Bs.00g430680.m01              | 5                         | 8380        | 1847        | 5.38 (0.53)                  | 2.75E-25 | Protein Phosphatase 2C Family                             |
| Bs.00g167370.m01              | 23                        | 2527        | 110         | 5.23 (0.48)                  | 2.31E-18 | Elo, Fatty Acid Acyl Transferase-Related                  |
| Bs.00g058830.m01              | 337                       | 54400       | 162         | 5.20 (0.50)                  | 5.41E-20 | Harbinger Transposase-Derived Nuclease Domain             |
| Bs.00g415260.m01              | 328                       | 31294       | 95          | 5.12 (0.46)                  | 4.78E-21 | WRKY Domain                                               |
| Bs.00g361960.m01              | 24                        | 1628        | 67          | 4.96 (0.43)                  | 1.07E-20 | Gibberellin 2-Beta-Dioxygenase 4                          |
| Bs.00g428250.m02              | 34                        | 5275        | 154         | 4.87 (0.52)                  | 7.13E-16 | C2 Domain (Calcium/Lipid-Binding Domain, Calb)            |
| Bs.00g244130.m01              | 100                       | 15352       | 154         | 4.70 (0.51)                  | 3.15E-17 | Protein TIFY 11A-Related                                  |
| Bs.00g181270.m02 <sup>a</sup> | 74                        | 6520        | 88          | 4.65 (0.49)                  | 2.26E-16 | Uncharacterized Protein                                   |
| Bs.00g428250.m01              | 34                        | 4864        | 142         | 4.64 (0.53)                  | 5.42E-14 | Extended Synaptotagmin-Related                            |
| Bs.00g512260.m01 <sup>i</sup> | 552                       | 20157       | 37          | 4.63 (0.42)                  | 9.41E-18 | Glyoxalase/Fosfomycin Resistance/Dioxygenase Domain       |
| Bs.00g228950.m01              | 2                         | 333         | 207         | 4.56 (0.55)                  | 1.44E-07 | Dehydration-Responsive Element-Binding Protein 1a-Related |
| Bs.00g481180.m01              | 11                        | 762         | 70          | 4.55 (0.46)                  | 1.44E-15 | Malectin-Like Carbohydrate-Binding Domain                 |

|                               | J01-S Untreated | J01-S 10 HAT |      |             |          |                                                      |
|-------------------------------|-----------------|--------------|------|-------------|----------|------------------------------------------------------|
| Bs.00g122020.m01 <sup>†</sup> | 20              | 13981        | 683  | 6.76 (0.41) | 3.41E-61 | Uncharacterized Protein                              |
| Bs.00g016210.m01 <sup>j</sup> | 2               | 1874         | 811  | 6.29 (0.43) | 2.46E-24 | Precursor of CEP13/CEP14                             |
| Bs.00g176460.m01              | 7               | 1155         | 173  | 5.88 (0.39) | 3.91E-32 | At-Hook Motif Nuclear-Localized Protein 27           |
| Bs.00g218880.m01              | 3               | 529          | 183  | 5.30 (0.43) | 3.47E-17 | D-Arabinono-1,4-Lactone Oxidase                      |
| Bs.00g168520.m01 <sup>k</sup> | 43              | 3475         | 80   | 5.23 (0.40) | 6.91E-31 | Cold Regulated Protein 27                            |
| Bs.00g168520.m02 <sup>k</sup> | 42              | 3334         | 78.7 | 5.08 (0.42) | 1.54E-27 | Cold Regulated Protein 27                            |
| Bs.00g176480.m01              | 1               | 295          | 511  | 5.07 (0.46) | 6.62E-07 | At-Hook Motif Nuclear-Localized Protein 27           |
| Bs.00g239120.m01 <sup>k</sup> | 6               | 1088         | 176  | 4.96 (0.49) | 3.49E-18 | Aquaporin Tip3-1-Related                             |
| Bs.00g478760.m01 <sup>h</sup> | 2               | 793          | 457  | 4.70 (0.49) | 3.96E-14 | 1-Aminocyclopropane-1-Carboxylate Synthase 4-Related |
| Bs.00g112620.m01              | 7               | 731          | 110  | 4.56 (0.47) | 8.44E-17 | Lipase/Lipoxygenase Domain                           |
| Bs.00g044610.m01 <sup>l</sup> | 263             | 9925         | 37.7 | 4.54 (0.35) | 1.05E-29 | Uncharacterized Protein                              |
| Bs.00g304090.m01 <sup>g</sup> | 154             | 4039         | 26.3 | 4.28 (0.31) | 7.03E-32 | AP2/ERF Domain                                       |
| Bs.00g477580.m01 <sup>c</sup> | 279             | 45370        | 162  | 4.28 (0.50) | 7.01E-23 | Indole-3-Acetic Acid-Amido Synthetase GH3.2-Related  |
| Bs.00g112710.m01              | 416             | 34778        | 83.5 | 4.24 (0.48) | 7.24E-20 | Lipoxygenase, C-Terminal                             |
| Bs.00g275080.m01              | 2               | 376          | 228  | 4.23 (0.48) | 5.48E-11 | Heme-Dependent Peroxidases                           |
| Bs.00g364070.m01              | 380             | 9639         | 25.4 | 4.22 (0.36) | 2.28E-22 | NAC Domain-Containing Protein 10-Related             |
| Bs.00g422990.m01 <sup>d</sup> | 3600            | 120541       | 33.5 | 4.15 (0.40) | 8.07E-20 | 4-Hydroxyphenylpyruvate Dioxygenase                  |
| Bs.00g359220.m02 <sup>n</sup> | 12              | 14262        | 1145 | 4.10 (0.58) | 4.71E-22 | Proteinase Inhibitor I13                             |
| Bs.00g520060.m01              | 448             | 8022         | 17.9 | 3.93 (0.24) | 1.18E-46 | B-Box Domain Protein 26-Related                      |
| Bs.00g058370.m01              | 1               | 152          | 131  | 3.92 (0.47) | 3.23E-07 | Metacaspase-4-Related                                |

<sup>a</sup> Shared between J01-S 3 HAT and Flur-R 3 HAT top 20 upregulated genes

<sup>c</sup> Shared between 9425-S 10 HAT, J01-S 10 HAT and Flur-R 3/10 HAT top 20 upregulated genes

<sup>d</sup> Shared between J01-S 10 HAT and Flur-R 10 HAT top 20 upregulated genes

<sup>g</sup> Shared between 9425-S 3 HAT and J01-S 10 HAT top 20 upregulated genes

<sup>h</sup> Shared between 9425-S 3 HAT, Flur-R10 HAT and J01-S 10 HAT top 20 upregulated genes

<sup>i</sup> Shared between J01-S 3 HAT and 9425-S 3 HAT upregulated top 20

<sup>j</sup> Shared between 9425-S 10 HAT, Flur-R 3/10 HAT and J01-S 3 HAT/10 HAT top 20 upregulated genes

<sup>k</sup> Shared between 9425-S 10 HAT, Flur-R 10 HAT and J01-S 10 HAT top 20 upregulated genes

<sup>l</sup> Shared between 9245-S 3 HAT/10 HAT and J01-S 10 HAT top 20 upregulated genes

<sup>n</sup> Shared between 9425-S 10 HAT and J01-S 10 HAT top 20 upregulated genes

<sup>†</sup> Shared between J01-S 3 HAT /10 HAT top 20 upregulated genes



Table 5. Top 20 upregulated genes in fluroxypyr-susceptible kochia (*Bassia scoparia*) line 9425 at 3 h after treatment (HAT) and 10 HAT compared to the untreated timepoint. Fold change was calculated using the mean of normalized counts which was produced using the DESeq2 package in R. Log2 Fold Change was calculated in DESeq2, log2 fold change standard error and adjusted *p*-value were also calculated in DESeq2. The Wald-test obtained *p*-values were adjusted using the Benjamini-Hochberg method. The FDR was <0.05.

| Gene ID                       | Mean of normalized counts |            | Fold Change | Log2 Fold Change ( $\pm$ SE) | P-value  | Gene Description                                                                                  |
|-------------------------------|---------------------------|------------|-------------|------------------------------|----------|---------------------------------------------------------------------------------------------------|
|                               | 9425 Untreated            | 9425 3 HAT |             |                              |          |                                                                                                   |
| Bs.00g044610.m01 <sup>1</sup> |                           |            |             |                              |          |                                                                                                   |
| †                             | 188                       | 9324       | 50          | 4.69 (0.32)                  | 3.31E-39 | Uncharacterized Protein                                                                           |
| Bs.00g301680.m01              | 973                       | 17616      | 18          | 3.73 (0.27)                  | 8.83E-32 | Auxin-Responsive Protein IAA15<br>Histidine Kinase/HSP90-Like ATPase<br>Superfamily               |
| Bs.00g174320.m01†             | 39                        | 664        | 17          | 3.36 (0.31)                  | 6.95E-19 | Cytochrome P450 734A1<br>Multi Antimicrobial Extrusion<br>Protein/Protein Detoxification 50       |
| Bs.00g050510.m01              | 150                       | 1971       | 13          | 3.36 (0.26)                  | 1.40E-24 | Auxin-Responsive Protein IAA1-Related                                                             |
| Bs.00g229060.m01              | 84                        | 2342       | 28          | 3.34 (0.41)                  | 1.90E-11 | Uncharacterized Protein                                                                           |
| Bs.00g107340.m01              | 474                       | 5929       | 13          | 3.34 (0.24)                  | 5.55E-30 | 1-Aminocyclopropane-1-Carboxylate<br>Synthase 4-Related                                           |
| Bs.00g293750.m01              | 16                        | 283        | 18          | 3.32 (0.34)                  | 6.03E-14 | Chaperone J-Domain Superfamily                                                                    |
| Bs.00g478760.m01 <sup>h</sup> | 7                         | 583        | 83          | 3.31 (0.44)                  | 3.80E-13 | Uncharacterized Protein                                                                           |
| Bs.00g506330.m01              | 49                        | 1128       | 23          | 3.27 (0.41)                  | 4.61E-10 | Lactoylglutathione Lyase Glyoxalase I                                                             |
| Bs.00g044350.m01              | 605                       | 9804       | 16          | 3.14 (0.36)                  | 7.06E-12 | Cytochrome P450 76c1-Related                                                                      |
| Bs.00g512260.m01 <sup>i</sup> | 100                       | 4635       | 46          | 3.13 (0.47)                  | 1.83E-05 | Late Embryogenesis Abundant Protein<br>Signal Transduction Response Regulator,<br>Receiver Domain |
| Bs.00g305330.m01              | 79                        | 2260       | 29          | 3.06 (0.45)                  | 5.39E-07 | AP2/ERF Transcription Factor ERF/PTI6                                                             |
| Bs.00g357520.m01              | 2                         | 88         | 41          | 2.96 (0.42)                  | 2.21E-07 | Zinc Finger, RING/FYVE/PHD-Type                                                                   |
| Bs.00g364640.m01              | 641                       | 7072       | 11          | 2.94 (0.31)                  | 4.70E-13 | Auxin-Responsive Protein IAA29                                                                    |
| Bs.00g304090.m01 <sup>g</sup> | 196                       | 2097       | 11          | 2.91 (0.30)                  | 1.87E-14 | Linoleate 9S-Lipoxygenase 5,<br>Chloroplastic                                                     |
| Bs.00g204690.m01              | 249                       | 4008       | 16          | 2.90 (0.41)                  | 1.21E-07 | WRKY Transcription Factor 46-Related                                                              |
| Bs.00g048560.m01              | 768                       | 8441       | 11          | 2.88 (0.31)                  | 4.70E-13 |                                                                                                   |
| Bs.00g112660.m01              | 352                       | 9548       | 27          | 2.87 (0.42)                  | 7.59E-10 |                                                                                                   |
| Bs.00g415260.m01              | 263                       | 9451       | 36          | 2.86 (0.47)                  | 3.22E-06 |                                                                                                   |

|                               | 336                   | 3706               | 11  | 2.85 (0.35) | 7.53E-10 | Uncharacterized Protein                                       |
|-------------------------------|-----------------------|--------------------|-----|-------------|----------|---------------------------------------------------------------|
|                               | <u>9425 Untreated</u> | <u>9425 10 HAT</u> |     |             |          |                                                               |
| Bs.00g290110.m01              |                       |                    |     |             |          |                                                               |
| Bs.00g427230.m01              | 28                    | 5143               | 183 | 6.20        | 1.09E-37 | Member of 'GDXG' Family of Lipolytic Enzymes                  |
| Bs.00g168520.m01 <sup>k</sup> | 46                    | 4282               | 94  | 5.64        | 6.80E-40 | Cold Regulated Protein 27                                     |
| Bs.00g168520.m02 <sup>k</sup> | 53                    | 4276               | 81  | 5.44        | 1.36E-35 | Cold Regulated Protein 27                                     |
| Bs.00g174320.m01 <sup>†</sup> | 39                    | 2571               | 66  | 5.40        | 1.17E-53 | Histidine Kinase/HSP90-Like ATPase Superfamily                |
| Bs.00g044610.m01 <sup>l</sup> |                       |                    |     |             |          |                                                               |
| †                             | 188                   | 10766              | 57  | 5.07        | 3.35E-49 | Uncharacterized Protein                                       |
| Bs.00g261820.m01              | 0                     | 77                 | 77  | 4.93        | 4.95E-07 | Pectin Lyase Fold/Virulence Factor                            |
| Bs.00g016210.m01 <sup>j</sup> | 2                     | 1675               | 988 | 4.87        | 9.19E-22 | Precursor of CEP13/CEP14                                      |
| Bs.00g413330.m01              | 620                   | 71783              | 116 | 4.85        | 4.01E-22 | Cystathionine Gamma-Lyase                                     |
| Bs.00g148640.m01 <sup>m</sup> | 660                   | 27633              | 42  | 4.71        | 1.26E-34 | 2-Oxoisovalerate Dehydrogenase Subunit Alpha 2, Mitochondrial |
| Bs.00g305280.m01              | 0                     | 52                 | 52  | 4.65        | 1.41E-05 | Allergen V5/TPX-1-Related, Conserved Site                     |
| Bs.00g142300.m01              | 0                     | 48                 | 48  | 4.58        | 2.08E-05 | Pectin Lyase Fold/Virulence Factor                            |
| Bs.00g477660.m01              | 9                     | 4426               | 510 | 4.56        | 1.47E-25 | Gibberellin-Regulated GASA/GAST/SNAKIN Family Protein-Related |
| Bs.00g359220.m02 <sup>n</sup> | 41                    | 15538              | 383 | 4.56        | 1.16E-25 | Proteinase Inhibitor I13, Potato Inhibitor I Superfamily      |
| Bs.00g239120.m01 <sup>k</sup> | 2                     | 1207               | 619 | 4.54        | 5.71E-14 | Aquaporin TIP3-1-Related                                      |
| Bs.00g208750.m01              | 287                   | 11553              | 40  | 4.52        | 1.72E-25 | CASP-Like Protein 1E1-Related                                 |
| Bs.00g430360.m01              | 60                    | 2663               | 44  | 4.44        | 7.76E-24 | Protein Early Flowering 4                                     |
| Bs.00g100040.m01              | 3                     | 789                | 228 | 4.43        | 5.81E-09 | Bet V I/Major Latex Protein                                   |
| Bs.00g477580.m01 <sup>c</sup> | 92                    | 39708              | 431 | 4.41        | 8.98E-30 | Indole-3-Acetic Acid-Amido Synthetase GH3.2-Related           |
| Bs.00g526000.m01              | 228                   | 9711               | 43  | 4.40        | 4.47E-21 | NAC Domain                                                    |
| Bs.00g447890.m01              | 0                     | 73                 | 73  | 4.36        | 6.43E-07 | Pectinesterase                                                |

<sup>c</sup> Shared between 9425-S 10 HAT, J01-S 10 HAT and Flur-R 3 HAT/10 HAT top 20 upregulated genes

<sup>s</sup> Shared between 9425-S 3 HAT and J01-S 10 HAT top 20 upregulated genes

- <sup>h</sup> Shared between 9425-S 3 HAT, Flur-R 10 HAT and J01-S 10 HAT top 20 upregulated genes
- <sup>l</sup> Shared between 9425-S 3 HAT and J01-S 3 HAT top 20 upregulated genes
- <sup>j</sup> Shared between 9425-S 10 HAT, Flur-R 3 HAT /10 HAT and J01-S 3 HAT/10 HAT top 20 upregulated genes
- <sup>k</sup> Shared between 9425-S 10 HAT, Flur-R 10 HAT and J01-S 10 HAT top 20 upregulated genes
- <sup>l</sup> Shared between 9425-S 3 HAT/10 HAT and J01-S 10 HAT top 20 upregulated genes
- <sup>m</sup> Shared between 9425-S 10 HAT and Flur-R 10 HAT top 20 upregulated genes
- <sup>n</sup> Shared between 9425-S 10 HAT and J01-S 10 HAT top 20 upregulated genes
- <sup>†</sup> Shared between 9425-S 3 HAT/10 HAT top 20 upregulated genes

Table 6. Top 20 downregulated genes in fluroxypyr resistant kochia (*Bassia scoparia*) line Flur-R at 3 h after treatment (HAT) and 10 HAT compared to the untreated timepoint. Fold change was calculated using the mean of normalized counts which was produced using the DESeq2 package in R. Log2 Fold Change was calculated in DESeq2, log2 fold change standard error and adjusted *p*-value were also calculated in DESeq2. The Wald-test obtained *p* values were adjusted using the Benjamini-Hochberg method. The FDR was <0.05.

| Gene ID                         | Mean of normalized counts |               | Fold Change | Log2 Fold Change ( $\pm$ SE) | Pvalue   | Gene Description                          |
|---------------------------------|---------------------------|---------------|-------------|------------------------------|----------|-------------------------------------------|
|                                 | Flur-R Untreated          | Flur-R 3 HAT  |             |                              |          |                                           |
| Bs.00g258890.m01 <sup>†</sup>   | 136                       | 2             | -66         | -3.96 (0.44)                 | 5.28E-11 | LRR                                       |
| Bs.00g104620.m01 <sup>e †</sup> | 7356                      | 172           | -43         | -3.64 (0.43)                 | 4.34E-13 | Protein Kinase                            |
| Bs.00g354480.m01 <sup>r</sup>   | 4017                      | 217           | -19         | -3.35 (0.37)                 | 4.39E-13 | SAM Dependent Carboxyl Methyltransferase  |
| Bs.00g370120.m01 <sup>r</sup>   | 197                       | 7             | -29         | -3.19 (0.45)                 | 2.63E-08 | Lipid Binding Domain                      |
| Bs.00g362240.m01                | 574                       | 29            | -20         | -3.16 (0.42)                 | 7.22E-09 | Bicarbonate Transporter                   |
| Bs.00g195790.m01 <sup>b</sup>   | 234                       | 10            | -24         | -3.10 (0.44)                 | 2.63E-08 | Proton Dependent Oligopeptide Transporter |
| Bs.00g056860.m01                | 127                       | 1             | -95         | -3.01 (0.48)                 | 1.48E-06 | Peptidase/Proteinase Inhibitor I9         |
| Bs.00g119650.m01                | 1565                      | 66            | -24         | -2.97 (0.44)                 | 4.39E-08 | Nicotianamine Synthase                    |
| Bs.00g251440.m01 <sup>r</sup>   | 687                       | 51            | -13         | -2.97 (0.37)                 | 3.33E-10 | Multicopper Oxidase                       |
| Bs.00g126000.m01 <sup>†</sup>   | 66186                     | 1694          | -39         | -2.94 (0.47)                 | 3.76E-08 | NADH Cytochrome B5 Reductase              |
| Bs.00g123470.m01                | 475                       | 38            | -13         | -2.92 (0.37)                 | 3.95E-10 | Glycoside Hydrolase                       |
| Bs.00g264170.m01 <sup>r</sup>   | 5895                      | 687           | -9          | -2.87 (0.23)                 | 6.32E-23 | Glycoside Hydrolase                       |
| Bs.00g195800.m01                | 205                       | 14            | -15         | -2.82 (0.42)                 | 3.44E-07 | Proton Dependent Oligopeptide Transporter |
| Bs.00g403960.m01 <sup>†</sup>   | 36087                     | 2902          | -12         | -2.75 (0.39)                 | 1.81E-08 | Carotenoid Oxygenase                      |
| Bs.00g528960.m01 <sup>r</sup>   | 1273                      | 96            | -13         | -2.73 (0.40)                 | 1.24E-07 | Auxin-Inducible                           |
| Bs.00g348080.m01                | 965                       | 77            | -13         | -2.73 (0.40)                 | 9.58E-08 | Uncharacterized Protein                   |
| Bs.00g420960.m01 <sup>p</sup>   | 1713                      | 12            | -148        | -2.65 (0.49)                 | 1.28E-08 | Chlorophyll A-B Binding Protein           |
| Bs.00g421070.m01 <sup>p</sup>   | 2101                      | 12            | -177        | -2.63 (0.49)                 | 4.44E-09 | Chlorophyll A-B Binding Protein           |
| Bs.00g429620.m01                | 67                        | 4             | -16         | -2.63 (0.44)                 | 2.53E-05 | Multicopper Oxidase                       |
| Bs.00g372170.m02                | 220                       | 11            | -20         | -2.62 (0.46)                 | 6.13E-06 | Uncharacterized Protein                   |
|                                 | Flur-R Untreated          | Flur-R 10 HAT |             |                              |          |                                           |

|                                |        |      |      |              |           |                                                          |
|--------------------------------|--------|------|------|--------------|-----------|----------------------------------------------------------|
| Bs.00g253530.m01 <sup>u</sup>  | 3988   | 31   | -131 | -6.56 (0.29) | 2.06E-91  | Tetratricopeptide-Like Helical Domain Superfamily        |
| Bs.00g240870.m01 <sup>u</sup>  | 389614 | 3606 | -108 | -6.40 (0.26) | 1.25E-104 | Chlorophyll A-B Binding Protein                          |
| Bs.00g240870.m02 <sup>u</sup>  | 246956 | 2360 | -105 | -6.35 (0.27) | 5.04E-101 | Chlorophyll A-B Binding Protein                          |
| Bs.00g060850.m01 <sup>u</sup>  | 59810  | 959  | -62  | -5.34 (0.36) | 1.12E-37  | Thiamine Thiazole Synthase                               |
| Bs.00g126000.m01 <sup>†</sup>  | 66186  | 447  | -148 | -5.12 (0.50) | 4.64E-19  | NADH-Cytochrome B5 Reductase                             |
| Bs.00g258890.m01 <sup>†</sup>  | 136    | 1    | -126 | -5.10 (0.48) | 1.28E-14  | Tyrosine-Protein Kinase, Active Site                     |
| Bs.00g205780.m01               | 1166   | 26   | -44  | -4.99 (0.32) | 8.66E-41  | Cytochrome P450 90A1                                     |
| Bs.00g133350.m02               | 459    | 11   | -44  | -4.88 (0.34) | 8.43E-35  | Serine Protease Family S10 Serine Carboxypeptidase       |
| Bs.00g104620.m01 <sup>e†</sup> | 7356   | 100  | -73  | -4.81 (0.45) | 7.39E-21  | Phosphoenolpyruvate Carboxylase Kinase 1-Related         |
| Bs.00g133350.m01               | 507    | 12   | -41  | -4.69 (0.36) | 3.06E-28  | Peptidase S10, Serine Carboxypeptidase                   |
| Bs.00g192330.m01               | 293420 | 9287 | -32  | -4.60 (0.31) | 1.24E-37  | Magnesium-Chelatase, Subunit H                           |
| Bs.00g279710.m01 <sup>f</sup>  | 7847   | 165  | -48  | -4.59 (0.42) | 6.82E-20  | Aerolysin-Like Toxin                                     |
| Bs.00g299020.m01               | 794    | 16   | -50  | -4.58 (0.44) | 9.29E-19  | O-Acyltransferase WSD1                                   |
| Bs.00g116620.m01               | 2862   | 91   | -31  | -4.54 (0.31) | 2.96E-37  | Coenzyme Q-Binding Protein Coq10                         |
| Bs.00g480400.m01 <sup>v</sup>  | 498    | 8    | -62  | -4.52 (0.49) | 4.12E-14  | Plc-Like Phosphodiesterase                               |
| Bs.00g206320.m01               | 10980  | 18   | -609 | -4.48 (0.58) | 5.73E-15  | Cytochrome P450 Superfamily                              |
| Bs.00g058520.m01 <sup>u</sup>  | 1710   | 65   | -26  | -4.47 (0.26) | 1.29E-47  | Acyl-CoA N-Acyltransferases                              |
| Bs.00g205800.m01               | 868    | 23   | -38  | -4.45 (0.41) | 1.42E-19  | Cytochrome P450 90A1                                     |
| Bs.00g403960.m01 <sup>†</sup>  | 36087  | 952  | -38  | -4.45 (0.38) | 4.49E-23  | Carotenoid Cleavage Dioxygenase 4, Chloroplastic-Related |
| Bs.00g471400.m01               | 279    | 6    | -43  | -4.44 (0.43) | 3.69E-17  | Voltage-gated potassium channels                         |

<sup>b</sup> Shared between J01-S 3 HAT and Flur-R 3 HAT top 20 downregulated genes

<sup>c</sup> Shared between J01-S 3 HAT and Flur-R 3 HAT/10 HAT top 20 downregulated genes

<sup>f</sup> Shared between J01-S 10 HAT and Flur-R 10 HAT top 20 downregulated genes

<sup>p</sup> Shared between 9425-S 3 HAT, J01-S 3 HAT and Flur-R 3 HAT top 20 downregulated genes

<sup>r</sup> Shared between 9425-S 3 HAT and Flur-R 3 HAT top 20 downregulated genes

<sup>v</sup> Shared between 9425-S 10 HAT and Flur-R 10 HAT top 20 downregulated genes

† Shared between Flur-R 3 HAT/10 HAT top 20 downregulated genes



Table 7. Top 20 downregulated genes in fluroxypyr susceptible kochia (*Bassia scoparia*) line J01-S at 3 h after treatment (HAT) and 10 HAT compared to the untreated timepoint. Fold change was calculated using the mean of normalized counts which was produced using the DESeq2 package in R. Log2 Fold Change was calculated in DESeq2, log2 fold change standard error and adjusted *p*-value were also calculated in DESeq2. The Wald-test obtained *p*-values were adjusted using the Benjamini-Hochberg method. The FDR was <0.05.

| Gene ID                         | Mean of normalized counts |             | Fold Change | Log2 Fold Change ( $\pm$ SE) | P-value  | Gene Description                                                               |
|---------------------------------|---------------------------|-------------|-------------|------------------------------|----------|--------------------------------------------------------------------------------|
|                                 | J01-S Untreated           | J01-S 3 HAT |             |                              |          |                                                                                |
| Bs.00g420960.m01 <sup>p</sup>   | 2805                      | 114         | -25         | -7.08 (0.43)                 | 3.21E-37 | Early Light-Induced Protein 1, Chloroplastic-Related                           |
| Bs.00g421070.m01 <sup>p</sup>   | 3659                      | 129         | -28         | -6.40 (0.46)                 | 1.24E-31 | Early Light-Induced Protein 1, Chloroplastic-Related                           |
| Bs.00g104620.m01 <sup>e †</sup> | 6485                      | 87          | -74         | -5.07 (0.37)                 | 1.81E-33 | Phosphoenolpyruvate Carboxylase Kinase 1-Related                               |
| Bs.00g518390.m01 <sup>o</sup>   | 1330                      | 91          | -15         | -4.38 (0.45)                 | 8.59E-17 | Chalcone/Stilbene Synthase                                                     |
| Bs.00g383340.m01 <sup>q †</sup> | 62541                     | 614         | -102        | -4.23 (0.38)                 | 5.29E-22 | S-Adenosyl-L-Methionine-Dependent Methyltransferase                            |
| Bs.00g383340.m02 <sup>q †</sup> | 63412                     | 627         | -101        | -4.22 (0.38)                 | 6.99E-22 | S-Adenosyl-L-Methionine-Dependent Methyltransferase                            |
| Bs.00g479050.m01                | 1337                      | 71          | -19         | -4.00 (0.37)                 | 2.08E-19 | Multicopper Oxidase, Type 1, 2, 3                                              |
| Bs.00g150590.m01                | 19150                     | 874         | -22         | -3.52 (0.23)                 | 6.20E-37 | Carboxyvinyl-Carboxyphosphonate Phosphorylmutase, Chloroplastic                |
| Bs.00g417520.m01                | 3342                      | 727         | -5          | -3.51 (0.46)                 | 1.48E-09 | Cytochrome P450 86a7                                                           |
| Bs.00g196880.m01                | 12374                     | 621         | -20         | -3.40 (0.29)                 | 7.21E-22 | Haloacid Dehalogenase-Like                                                     |
| Bs.00g228740.m01                | 3131                      | 464         | -7          | -3.36 (0.43)                 | 4.71E-10 | Hydrolase Domain-Containing Protein<br>Glucose-Methanol-Choline Oxidoreductase |
| Bs.00g488230.m02 <sup>s</sup>   | 493                       | 30          | -16         | -3.27 (0.39)                 | 4.26E-11 | BTB/POZ Domain-Containing Protein<br>Dot3                                      |
| Bs.00g091650.m01                | 5414                      | 1641        | -3          | -3.24 (0.40)                 | 1.94E-10 | Cytochrome P450 77A4-Related                                                   |
| Bs.00g179870.m01                | 560                       | 21          | -27         | -3.20 (0.48)                 | 1.00E-07 | Thioredoxin-LIK                                                                |
| Bs.00g488230.m01 <sup>s</sup>   | 589                       | 39          | -15         | -3.15 (0.38)                 | 3.15E-11 | BTB/POZ Domain-Containing Protein<br>DOT3                                      |
| Bs.00g124100.m01                | 25716                     | 1786        | -14         | -3.14 (0.37)                 | 1.34E-11 | Multi Antimicrobial Extrusion Protein                                          |
| Bs.00g195790.m01 <sup>b</sup>   | 661                       | 34          | -20         | -3.11 (0.53)                 | 1.62E-06 | Proton-Dependent Oligopeptide Transporter Family                               |

|                                |                        |                     |      |              |           |                                                                   |
|--------------------------------|------------------------|---------------------|------|--------------|-----------|-------------------------------------------------------------------|
| Bs.00g247060.m01               | 1115                   | 125                 | -9   | -3.08 (0.36) | 3.19E-11  | Major Facilitator Protein Peptidase S10, Serine                   |
| Bs.00g418430.m01               | 2076                   | 95                  | -22  | -3.05 (0.24) | 3.85E-24  | Carboxypeptidase                                                  |
| Bs.00g310680.m01               | 4294                   | 815                 | -5   | 3.02 (0.39)  | 3.14E-09  | Aquaporin transporter                                             |
|                                | <u>J01-S Untreated</u> | <u>J01-S 10 HAT</u> |      |              |           |                                                                   |
| Bs.00g237950.m01               | 31050                  | 185                 | -168 | -6.11 (0.47) | 2.24E-29  | Purine and Uridine Phosphorylases                                 |
| Bs.00g383340.m01 <sup>q†</sup> | 62541                  | 614                 | -102 | -5.98 (0.34) | 5.59E-55  | S-Adenosyl-L-Methionine-Dependent Methyltransferase               |
| Bs.00g383340.m02 <sup>q†</sup> | 63412                  | 627                 | -101 | -5.97 (0.34) | 7.93E-55  | S-Adenosyl-L-Methionine-Dependent Methyltransferase               |
| Bs.00g060850.m01 <sup>u</sup>  | 61097                  | 963                 | -63  | -5.71 (0.25) | 7.00E-96  | Thiamine Thiazole Synthase                                        |
| Bs.00g253530.m01 <sup>u</sup>  | 3380                   | 51                  | -66  | -5.61 (0.30) | 2.91E-59  | Tetratricopeptide-Like Helical Domain Superfamily                 |
| Bs.00g104620.m01 <sup>e†</sup> | 6485                   | 87                  | -74  | -5.57 (0.33) | 7.03E-51  | Phosphoenolpyruvate Carboxylase Kinase 1-Related                  |
| Bs.00g002550.m01 <sup>t</sup>  | 6898                   | 56                  | -123 | -5.53 (0.50) | 1.28E-19  | Glucose-6-Phosphate/Phosphate Translocator 2, Chloroplastic       |
| Bs.00g058520.m01 <sup>u</sup>  | 2423                   | 35                  | -69  | -5.51 (0.36) | 1.50E-39  | Acyl-CoA N-Acyltransferase                                        |
| Bs.00g279710.m01 <sup>f</sup>  | 25350                  | 388                 | -65  | -5.38 (0.41) | 1.01E-26  | Aerolysin-Like Toxin                                              |
| Bs.00g240870.m01 <sup>u</sup>  | 407872                 | 5349                | -76  | -5.26 (0.45) | 3.48E-22  | Chlorophyll A-B Binding Protein                                   |
| Bs.00g240870.m02 <sup>u</sup>  | 265402                 | 3480                | -76  | -5.24 (0.46) | 1.70E-21  | Chlorophyll A-B Binding Protein                                   |
| Bs.00g236450.m01               | 13388                  | 387                 | -35  | -4.88 (0.24) | 4.84E-72  | Protein Proton Gradient Regulation 5                              |
| Bs.00g115330.m01               | 71272                  | 1829                | -39  | -4.85 (0.34) | 7.75E-34  | Photosystem I Reaction Center Subunit Iv A, Chloroplastic-Related |
| Bs.00g020870.m01               | 209812                 | 6578                | -32  | -4.69 (0.28) | 3.26E-46  | Chlorophyll A/B Binding Protein                                   |
| Bs.00g412900.m01               | 18823                  | 572                 | -33  | -4.65 (0.31) | 1.54E-39  | Granule-Bound Starch Synthase 1, Chloroplastic/Amyloplastic       |
| Bs.00g476760.m01               | 699                    | 11                  | -62  | -4.63 (0.50) | 4.10E-14  | Z -3-Hexen-1-Ol Acetyltransferase                                 |
| Bs.00g527540.m01               | 7607                   | 68                  | -112 | -4.47 (0.58) | 7.97E-10  | Proteinase Inhibitor I3, Kunitz Legume                            |
| Bs.00g472680.m01               | 1623                   | 58                  | -28  | -4.35 (0.36) | 3.49E-23  | Uncharacterized Protein                                           |
| Bs.00g383860.m01               | 33142                  | 1574                | -21  | -4.31 (0.15) | 7.02E-130 | Fructose-1,6-Bisphosphatase-Related                               |
| Bs.00g055990.m01               | 635                    | 21                  | -30  | -4.28 (0.40) | 3.67E-19  | Uncharacterized Protein                                           |

<sup>b</sup> Shared between J01-S 3 HAT and Flur-R 3 HAT top 20 downregulated genes

- <sup>e</sup> Shared between 9425-S 3 HAT, J01-S 3 HAT/10 HAT and Flur-R 3 HAT/10 HAT top 20 downregulated genes
- <sup>f</sup> Shared between J01-S 10 HAT and Flur-R 10 HAT top 20 downregulated genes
- <sup>o</sup> Shared between 9425-S 3 HAT/10 HAT and J01-S 3 HAT top 20 downregulated genes
- <sup>p</sup> Shared between 9425-S 3 HAT, J01-S 3 HAT and Flur-R 3 HAT top 20 downregulated genes
- <sup>q</sup> Shared between 9425-S 3 HAT and J01-S 3 HAT/10 HAT top 20 downregulated genes
- <sup>s</sup> Shared between 9425-S 3 HAT and J01-S 3 HAT top 20 downregulated genes
- <sup>t</sup> Shared between 9425-S 10 HAT and J01-S 10 HAT top 20 downregulated genes
- <sup>u</sup> Shared between 9425-S 10 HAT, J01-10 HAT, Flur-R 10 HAT top 20 downregulated genes
- <sup>w</sup> Shared between 9425-S 10 HAT and J01-S 3 HAT top 20 downregulated genes

Table 8. Top 20 downregulated genes in fluroxypyr susceptible kochia (*Bassia scoparia*) line 9425 at 3 hours after treatment (HAT) and 10HAT compared to the untreated timepoint. Fold change was calculated using the mean of normalized counts which was produced using the DESeq2 package in R. Log2 Fold Change was calculated in DESeq2, log2 fold change standard error and adjusted *p*-value were also calculated in DESeq2. The Wald-test obtained *p*-values were adjusted using the Benjamini-Hochberg method. The FDR was <0.05.

| Gene ID                        | Mean of normalized counts |            | Fold Change | Log2 Fold Change ( $\pm$ SE) | Pvalue   | Gene Description                                           |
|--------------------------------|---------------------------|------------|-------------|------------------------------|----------|------------------------------------------------------------|
|                                | 9425 Untreated            | 9425 3 HAT |             |                              |          |                                                            |
| Bs.00g518390.m01 <sup>o†</sup> | 4504                      | 68         | 67          | -5.06                        | 1.80E-41 | Chalcone/Stilbene Synthase                                 |
| Bs.00g421070.m01 <sup>P</sup>  | 1918                      | 8          | 238         | -3.69                        | 1.06E-14 | Early Light-Induced Protein 1, Chloroplastic-Related       |
| Bs.00g420960.m01 <sup>P</sup>  | 1557                      | 7          | 210         | -3.61                        | 9.55E-14 | Early Light-Induced Protein 1, Chloroplastic-Related       |
| Bs.00g543360.m01               | 2375                      | 98         | 24          | -3.38                        | 1.15E-11 | Oxoglutarate/Iron-Dependent Dioxxygenase                   |
| Bs.00g383340.m01 <sup>q</sup>  | 13230                     | 691        | 19          | -3.31                        | 1.70E-12 | S-Adenosyl-L-Methionine-Dependent Methyltransferase        |
| Bs.00g383340.m02 <sup>q</sup>  | 13404                     | 701        | 19          | -3.31                        | 1.82E-12 | S-Adenosyl-L-Methionine-Dependent Methyltransferase        |
| Bs.00g354480.m01 <sup>r</sup>  | 1542                      | 87         | 18          | -3.25                        | 1.69E-11 | S-Adenosyl-L-Methionine-Dependent Methyltransferase        |
| Bs.00g370120.m01 <sup>r</sup>  | 364                       | 8          | 45          | -3.20                        | 6.65E-09 | CRAL-TRIO Lipid Binding Domain                             |
| Bs.00g268300.m01 <sup>†</sup>  | 724                       | 5          | 140         | -3.16                        | 2.50E-10 | Early Light-Induced Protein 1, Chloroplastic-Related       |
| Bs.00g364920.m01               | 453                       | 37         | 12          | -3.13                        | 1.87E-15 | Serine-Threonine/Tyrosine-Protein Kinase, Catalytic Domain |
| Bs.00g488230.m01 <sup>s</sup>  | 532                       | 38         | 14          | -3.11                        | 2.63E-12 | BTB/POZ Domain-Containing Protein DOT3                     |
| Bs.00g488230.m02 <sup>s</sup>  | 447                       | 37         | 12          | -3.02                        | 1.55E-12 | BTB/POZ Domain-Containing Protein DOT3                     |
| Bs.00g475340.m01               | 478                       | 38         | 13          | -2.95                        | 1.42E-09 | Camp-Response Element Binding Protein-Related              |
| Bs.00g528960.m01 <sup>r</sup>  | 880                       | 51         | 17          | -2.89                        | 1.17E-07 | Auxin_Inducible                                            |
| Bs.00g180610.m01               | 1127                      | 60         | 19          | -2.86                        | 1.87E-07 | Glycoside Hydrolase Family 1                               |
| Bs.00g251440.m01 <sup>r</sup>  | 1535                      | 140        | 11          | -2.81                        | 4.78E-10 | Multicopper Oxidase, Type 2                                |
| Bs.00g396960.m01               | 646                       | 57         | 11          | -2.70                        | 3.62E-08 | UDP-Glycosyltransferase/Glycogen                           |

|                                | 9425-S Untreated | 9425 10 HAT |     |       |          |                                                                                               |
|--------------------------------|------------------|-------------|-----|-------|----------|-----------------------------------------------------------------------------------------------|
| Bs.00g420270.m01               | 1575             | 133         | 12  | -2.67 | 2.39E-06 | Phosphorylase                                                                                 |
| Bs.00g104620.m01 <sup>e</sup>  | 1497             | 106         | 14  | -2.67 | 9.72E-07 | Glucose-Methanol-Choline Oxidoreductase                                                       |
| Bs.00g264170.m01 <sup>r</sup>  | 11365            | 1301        | 9   | -2.66 | 1.13E-10 | Serine/Threonine-Protein Kinase                                                               |
|                                |                  |             |     |       |          | Beta-Glucosidase 1-Related                                                                    |
| Bs.00g002550.m01 <sup>t</sup>  | 10014            | 41          | 242 | -6.95 | 3.36E-47 | Glucose-6-Phosphate/Phosphate Translocator 2, Chloroplastic                                   |
| Bs.00g518390.m01 <sup>o†</sup> | 4504             | 21          | 213 | -6.94 | 7.61E-75 | Chalcone/Stilbene Synthase, C-Terminal                                                        |
| Bs.00g240870.m01 <sup>u</sup>  | 419016           | 3501        | 120 | -6.09 | 2.32E-35 | Chlorophyll A-B Binding Protein                                                               |
| Bs.00g240870.m02 <sup>u</sup>  | 274431           | 2301        | 119 | -6.09 | 4.32E-35 | Chlorophyll A-B Binding Protein                                                               |
| Bs.00g058520.m01 <sup>u</sup>  | 3828             | 37          | 103 | -6.08 | 4.85E-49 | Acyl-CoA N-Acyltransferase                                                                    |
| Bs.00g060850.m01 <sup>u</sup>  | 105278           | 1179        | 89  | -5.75 | 2.70E-36 | Thiamine Thiazole Synthase                                                                    |
| Bs.00g253530.m01 <sup>u</sup>  | 3725             | 49          | 76  | -5.63 | 1.99E-37 | Tetratricopeptide-Like Helical Domain Superfamily                                             |
| Bs.00g535160.m01               | 480              | 4           | 110 | -5.57 | 2.65E-21 | WAT1-Related Protein                                                                          |
| Bs.00g124870.m01               | 18471            | 116         | 160 | -5.33 | 8.61E-16 | Lipoxygenase                                                                                  |
| Bs.00g480400.m01 <sup>v</sup>  | 684              | 8           | 85  | -5.33 | 1.31E-20 | PLC-Like Phosphodiesterase                                                                    |
| Bs.00g418430.m01               | 3350             | 46          | 73  | -5.33 | 6.52E-27 | Peptidase S10, Serine Carboxypeptidase                                                        |
| Bs.00g535430.m01               | 143              | 1           | 108 | -5.30 | 7.70E-15 | Cyclin_A_B_D_E                                                                                |
| Bs.00g518030.m01               | 721              | 2           | 412 | -5.13 | 1.43E-12 | Chalcone/Stilbene Synthase, Polyketide Synthase, Type III, Hydroxymethylglutaryl-CoA Synthase |
| Bs.00g055200.m01               | 754              | 15          | 51  | -5.06 | 7.48E-28 | Glyceraldehyde-3-Phosphate Dehydrogenase-Like                                                 |
| Bs.00g535430.m02               | 121              | 1           | 92  | -5.05 | 2.97E-13 | Cyclin_A_B_D_E                                                                                |
| Bs.00g249240.m01               | 212              | 2           | 117 | -5.02 | 5.87E-13 | Uncharacterized Protein                                                                       |
| Bs.00g268300.m01 <sup>†</sup>  | 724              | 4           | 171 | -5.01 | 6.54E-14 | Early Light-Induced Protein 1                                                                 |
| Bs.00g435140.m01               | 1573             | 29          | 55  | -4.95 | 4.56E-22 | Proton-Dependent Oligopeptide Transporter Family                                              |
| Bs.00g136920.m01               | 1931             | 16          | 123 | -4.92 | 1.48E-13 | Cupin_1                                                                                       |
| Bs.00g478150.m01               | 781              | 6           | 138 | -4.90 | 1.45E-11 | Glycoside Hydrolase Family 17                                                                 |

- <sup>e</sup> Shared between 9425 3 HAT, J01-3 HAT/10 HAT and Flur-R 3 HAT/10 HAT top 20 downregulated genes
- <sup>o</sup> Shared between 9425-S 3 HAT/10 HAT and J01-S 3 HAT top 20 downregulated genes
- <sup>p</sup> Shared between 9425-S 3 HAT, J01-S 3 HAT and Flur-R 3 HAT top 20 downregulated genes
- <sup>q</sup> Shared between 9425-S 3 HAT and J01-S 3 HAT/10 HAT top 20 downregulated genes
- <sup>r</sup> Shared between 9425-S 3 HAT and Flur-R 3 HAT top 20 downregulated genes
- <sup>s</sup> Shared between 9425-S 3 HAT and J01-S 3 HAT top 20 downregulated genes
- <sup>t</sup> Shared between 9425-S 10 HAT and J01-S 10 HAT top 20 downregulated genes
- <sup>v</sup> Shared between 9425-S 10 HAT and Flur-R 10 HAT top 20 downregulated genes
- <sup>w</sup> Shared between 9425-S 10 HAT and J01-S 3 HAT top 20 downregulated genes
- <sup>†</sup> Shared between 9425-S 3 HAT and 10 HAT top 20 downregulated genes
